# 1 NuMorph: tools for cellular phenotyping in tissue cleared whole 2 brain images

3  
4 Oleh Krupa<sup>1,2,3</sup>, Giulia Fragola<sup>2,4,5</sup>, Ellie Hadden-Ford<sup>2,3</sup>, Jessica T. Mory<sup>2,3</sup>, Tianyi Liu<sup>2,3,6</sup>, Zachary  
5 Humphrey<sup>2,3</sup>, Ashok Krishnamurthy<sup>7</sup>, Mark J. Zylka<sup>2,4</sup>, Guorong Wu<sup>8,9</sup>, and Jason L. Stein<sup>2,3,10,\*</sup>

6  
7 1) Joint Department of Biomedical Engineering, University of North Carolina at Chapel Hill and North  
8 Carolina State University, Chapel Hill, North Carolina 27514, USA

9 2) UNC Neuroscience Center, University of North Carolina at Chapel Hill, Chapel Hill, NC 27599, USA

10 3) Department of Genetics, University of North Carolina at Chapel Hill, Chapel Hill, NC 27599, USA

11 4) Department of Cell Biology and Physiology, University of North Carolina at Chapel Hill, Chapel Hill, NC,  
12 27599, USA

13 5) Department of Neurology, University of North Carolina at Chapel Hill, Chapel Hill, NC 27599, USA

14 6) Department of Biostatistics, University of North Carolina at Chapel Hill, Chapel Hill, NC 27599 USA

15 7) Renaissance Computing Institute, Chapel Hill, NC 27599, USA

16 8) Department of Psychiatry, University of North Carolina at Chapel Hill, Chapel Hill, NC 27514, USA

17 9) Department of Computer Science, University of North Carolina at Chapel Hill, Chapel Hill, NC 27514,  
18 USA

19 10) Lead Contact

20 Correspondence: [jason\\_stein@med.unc.edu](mailto:jason_stein@med.unc.edu)

## 25 Abstract

26 Tissue clearing methods allow every cell in the mouse brain to be imaged without physical  
27 sectioning. However, the computational tools currently available for cell quantification in cleared  
28 tissue images have been limited to counting sparse cell populations in stereotypical mice. Here  
29 we introduce NuMorph, a group of image analysis tools to quantify all nuclei and nuclear  
30 markers within the mouse cortex after tissue clearing and imaging by a conventional light-sheet  
31 microscope. We applied NuMorph to investigate a *Topoisomerase 1 (Top1)* conditional  
32 knockout mouse model with severe brain structure deficits and identified differential effects of  
33 *Top1* deletion on cortical cell-types and structures that were associated with spatial patterns of  
34 long gene expression. These tools are applicable for the study of 3D cellular level structural  
35 deficits in brains from other animal models of neuropsychiatric disorders.

## 36 Introduction

37 The mammalian cortex is composed of a diverse assembly of cell-types organized into complex  
38 networks, which function together to enable complex behaviors (Harris et al., 2019; Tasic et al.,  
39 2018; Zeisel et al., 2015). Disruption of cortical cytoarchitecture, either by genetic or  
40 environmental perturbation, can lead to altered brain function and create risk for  
41 neuropsychiatric disorders (Shin Yim et al., 2017; Stoner et al., 2014). A common approach for

42 studying the mechanisms by which genetic variation increases risk for neuropsychiatric  
43 disorders is through the use of genetically modified animal models in a WT/KO experimental  
44 design. In order to observe the causal effects of disorder relevant genes on structure-function  
45 relationships, genetic tools can be applied to activate or silence genes in specific cell-types  
46 (Tsien et al., 1996) by imaging cellular organization through fluorescence microscopy. One  
47 critical goal in such experiments is to determine if the number of cells of a given type are altered  
48 by these genetic risk factors throughout different brain structures. However, a common limitation  
49 in imaging experiments done at cellular resolution is that they are restricted to anatomical  
50 regions of interest by physical sectioning which prevents the detection of region-specific effects.  
51 This becomes a particular issue for the cortex, one of the largest structures in the brain (Wang  
52 et al., 2020), where heterogeneity between cortical areas is often unmeasured by standard  
53 methods.

54  
55 In order to image the entire brain without physical sectioning, tissue clearing methods render  
56 biological specimens transparent while preserving their 3 dimensional structure. Cleared tissues  
57 can then be rapidly imaged using light-sheet microscopy as plane illumination improves  
58 acquisition rates by 2-3 orders of magnitude compared to point scanning systems while also  
59 limiting the effects of photobleaching (Richardson and Lichtman, 2015; Ueda et al., 2020). Great  
60 strides have been made in the development of clearing protocols that are compatible with  
61 immunolabeling and the design of complementary sophisticated imaging systems (Matsumoto  
62 et al., 2019; Murray et al., 2015; Park et al., 2018; Susaki et al., 2020). Yet challenges still  
63 remain in expanding the accessibility of these technologies to research labs for quantitative  
64 analysis at cellular resolution.

65  
66 For example, many of the current imaging protocols for whole brain profiling require custom light  
67 sheet systems to image tissues at cellular resolution (Fei et al., 2019; Matsumoto et al., 2019;  
68 Pende et al., 2018; Tomer et al., 2014; Voigt et al., 2019). These systems are therefore  
69 inaccessible to those lacking the expertise or resources required to assemble the necessary  
70 microscope components. Expanding tissues during the clearing process is a potential  
71 workaround that can increase the effective spatial resolution allowing for interrogation of  
72 subcellular structures without the need for custom imaging solutions (Chen et al., 2015; Gao et  
73 al., 2019; Ku et al., 2016; Murakami et al., 2018). However, expanded tissues can fall outside of  
74 the working distance of conventional microscope objectives and require prolonged imaging  
75 times with significantly larger data storage resources. Therefore, computational tools designed  
76 for conventional light sheet microscope users are needed to compare cell counts in a WT/KO  
77 design.

78  
79 With over 100 million cells in a mouse brain and image sizes of tissue cleared brain  
80 approaching terabytes, advanced image analysis tools are needed to achieve accurate cell  
81 quantification. Current segmentation methods for tissue cleared brain images apply a threshold  
82 for nuclear staining intensity and filter objects with a predefined shape, size, and/or density  
83 (Renier et al. 2016; Matsumoto et al. 2019; Fürth et al. 2018). However, variations in cell size,  
84 image contrast, and labeling intensity can all lead to inaccurate counts. In addition, whole brain  
85 images are typically registered to a standard reference, such as the Allen Reference Atlas

86 (ARA), to assign cell locations to their corresponding structural annotations. Thus far, image  
87 registration has been performed mostly on stereotypical mice and has not been designed for  
88 mouse models with significant changes in gross morphology. With these limitations, the  
89 computational tools currently available have not been fully adopted for studying cellular  
90 organization in mouse models.

91  
92 To address these issues, we developed a group of image analysis tools called NuMorph  
93 (Nuclear-Based Morphometry) (available here: <https://bitbucket.org/steinlabunc/numorph/>) for  
94 end-to-end processing to perform cell-type quantification within the mouse cortex after tissue  
95 clearing and imaging by a conventional light-sheet microscope. To demonstrate the  
96 effectiveness of the tool, we applied and evaluated NuMorph to quantify structural changes in a  
97 mouse model with strong differences in cortical structure, a topoisomerase I (*Top1*) conditional  
98 knockout (*Top1* cKO) mouse model that exhibits clear reductions in both cortical size and  
99 specific cell types (Fragola et al., 2020). Our results reveal cell-type and structure specific  
100 effects caused by *Top1* deletion and demonstrate the broad applicability of our analysis tools for  
101 studying severe brain structure phenotypes in combination with tissue clearing methods.

## 102 Methods

### 103 Animals

104 *Top1* conditional knockout mice (*Neurod6*<sup>Cre/+</sup>::*Top1*<sup>fl/fl</sup>, *Top1* cKO) were bred by crossing  
105 *Top1*<sup>fl/fl</sup> mice (Mabb et al., 2016) with the *Neurod6*<sup>Cre</sup> mouse line (Jackson Laboratory)  
106 (Goebbels et al., 2006) as described previously (Fragola et al., 2020). All animal procedures  
107 were approved by the University of North Carolina at Chapel Hill Institutional Animal Care and  
108 Use Committee. Mice were maintained on a 12-hr dark/light cycle and housed at temperatures  
109 of 18-23°C, 40-60% humidity, and *ad libitum* food and water. Genomic DNA extracted from tail  
110 or ear samples was utilized for genotyping by PCR. Primers for gene amplification are as  
111 follows (listed 5'-3'): *Top1*-F: GAGTTTCAGGACAGCCAGGA, *Top1*-R:  
112 GGACCGGGAAAAGTCTAAGC; Cre-F: GATGGACATGTTTCAGGGATCGCC, Cre-R:  
113 CTCCCATCAGTACGTGAGAT. Male P15 *Top1* cKO were used for tissue clearing experiments  
114 along with WT (*Neurod6*<sup>+/+</sup>::*Top1*<sup>fl/fl</sup>) littermate controls.

### 115 Tissue Clearing & Immunolabeling

116 Tissue clearing was performed on 4 WT and 4 *Top1* cKO according to the iDISCO+ protocol  
117 (Renier et al., 2016). Briefly, P15 mice were fixed via transcardial perfusion using 4%  
118 paraformaldehyde and whole brain samples were dissected and cut along the midline. As the  
119 effects of *Top1* deletion on gross structure were bilateral upon visual inspection, only the left  
120 hemisphere was used in clearing experiments and analysis. Samples were then washed in  
121 phosphate-buffered-saline (PBS), dehydrated in a graded series of methanol (Fisher, A412SK),  
122 pretreated with 66% dichloromethane (Sigma- Aldrich, 270997)/methanol and 5% H<sub>2</sub>O<sub>2</sub>  
123 (Sigma-Aldrich, H1009)/methanol, followed by rehydration, permeabilization (20% dimethyl-  
124 sulfoxide, Fisher, BP2311; 1.6% Triton X100, Sigma-Aldrich, T8787; 23mg/mL Glycine, Sigma-  
125 Aldrich G7126), and blocking with 6% goat serum (Abcam, ab7481). Samples were then

126 incubated with antibodies for Cux1 (Santa Cruz, sc-13024-Rb, 1:200) and Ctip2 (Abcam,  
127 ab18465-Rt, 1:500) for 5 days at 37°C in PTwH buffer (PBS; 0.5% Tween-20, Fisher, BP337;  
128 10mg/L Heparin, Sigma-Aldrich, H3393) . After 2 days of washing with PTwH, samples were  
129 then incubated with TO-PRO-3 (Thermo Fisher, T3605, 1:300), goat anti-rat Alexa Fluor 568  
130 (Thermo Fisher, A11077, 1:200), and goat anti-rabbit Alexa Fluor 790 (Thermo Fisher, A11369,  
131 1:50) for an additional 5 days at 37°C. Samples were then washed for 2 days with PTwH,  
132 dehydrated again using a graded methanol series, incubated in 66% dichloromethane/methanol  
133 for 3 hours, followed by a 30 minute incubation in 100% dichloromethane before storing in a  
134 dibenzyl ether solution (RI = 1.56, Sigma-Aldrich, 108014) at RT. Tissue clearing and antibody  
135 labeling required 21 days to complete.

### 136 Light-Sheet Imaging

137 Imaging of cleared brain samples was performed using the Ultramicroscope II (LaVision Biotec)  
138 equipped with MVPLAPO 2X/0.5 NA objective (Olympus), sCMOS camera (Andor), and  
139 ImSpector control software. The zoom body was set to 2.5x magnification (yielding 1.21  
140  $\mu\text{m}/\text{pixel}$ ) and a single light sheet was used with NA = 0.085 (9  $\mu\text{m}$  thickness/ 4  $\mu\text{m}$  z-step) as  
141 this showed increased axial resolution for cell nuclei compared to using multiple light sheets.  
142 Dynamic horizontal focusing using the contrast enhanced setting in ImSpector was used to  
143 ensure axial resolution was maintained along the width of the image using the recommended  
144 number of steps depending on the laser wavelength. In addition, images were partially cropped  
145 by ~20% around the edges to a region of interest at the center (~2100x1800 pixels) to limit  
146 radial aberrations at the corners of the field of view due to the camera lens tube. Samples were  
147 positioned sagittally with the cortex surface facing the single illuminating light-sheet (Figure  
148 S1D). This prevented excessive light scattering and shadowing from affecting the image quality  
149 in the cortical regions. Individual channels were acquired for tiled positions in a row-major order  
150 using 561nm (Ctip2), 647nm (ToPro), or 785nm (Cux1) laser lines. The 785nm channel was  
151 imaged first for the entire hemisphere. After refocusing the objective, the 561nm/647nm  
152 channels were then captured sequentially for each stack at a given tile position. Using these  
153 settings, WT mouse hemispheres were acquired using a 4x4 tiling scheme with 15% overlap (5-  
154 7 hours per channel) while *Top1* cKO hemispheres were acquired using a 3x3 tiling scheme (3-  
155 4 hours per channel) due to their significantly reduced size.

### 156 Computing Resources

157 All data processing was performed locally on a Linux workstation running CentOS 7. The  
158 workstation was equipped with an Intel Xeon E5-2690 V4 2.6GHz 14-core processor, 8 x 64GB  
159 DDR4 2400 LRDIMM memory, 4 x EVGA GeForce GTX 1080 Ti 11GB GPU, and 2 x 4TB  
160 Samsung EVO 860 external SSDs. Hot swap bays were used to transfer data from the imaging  
161 computer to the analysis workstation.

### 162 Image Preprocessing

163 Image preprocessing consists of all the necessary steps to prepare acquired raw images for  
164 image registration and cell quantification. All preprocessing steps were performed using custom  
165 written MATLAB R2020a scripts included in NuMorph and are described below.

## 166 Intensity Adjustments

167 Two types of image intensity adjustments were performed on raw images prior to image  
168 stitching to increase accuracy of subsequent processing. First, uneven illumination along the  $y$   
169 dimension (perpendicular to the light path) of each 2D image caused by the Gaussian shape of  
170 the light sheet was corrected using a MATLAB implementation of BaSiC, a tool for retrospective  
171 shading correction (Peng et al., 2017). We used 10% of all images, excluding tile positions  
172 around the cerebellum, to estimate a flatfield image for each channel. Each image was then  
173 divided by the flatfield prior to alignment and stitching to correct for uneven illumination. Second,  
174 differences in intensity distributions between image tile stacks, primarily as a result of  
175 photobleaching and light attenuation, were measured in the horizontal and vertical overlapping  
176 regions of adjacent tiles. To ensure bright features were of equal intensity between each stack,  
177 we measured the relative difference ( $t^{adj}$ ) in the 95th percentile of pixel intensities in  
178 overlapping regions from 5% of all images. The measured image intensity  $I^{meas}$  at tile location  
179  $(x, y)$  was then adjusted according to:

$$180 \quad I^{adj}(x, y) = (I^{meas}(x, y) - D) * t^{adj}(x, y) + D$$

181  
182 where  $D$  is the darkfield intensity (set as a constant value based on the 5th percentile of pixel  
183 intensities in all measured regions).  
184

## 185 Image Channel Alignment

186 As image channels are acquired one at a time, subtle drift in stage and sample positions during  
187 imaging may result in spatial misalignment between the reference nuclei channel and the  
188 remaining immunolabeled markers in a multichannel image. We tested two image registration  
189 approaches to ensure robust alignment across image channels. The first approach estimates  
190 2D slice translations to align the immunolabeled channel images to the nuclear channel image.  
191 The axial ( $z$ ) correspondence between the nuclei channel and every other channel within an  
192 image stack of an individual tile is first estimated using phase correlation at 20 evenly spaced  
193 positions within the stack. The correspondence along the axial direction with the highest image  
194 similarity (based on intensity correlation) determines the relative tile  $z$  displacement between  
195 channels (up to 50  $\mu\text{m}$  in some cases).  $xy$  translations are then determined after multimodal  
196 image registration for each slice in the tile stack using MATLAB's Image Processing toolbox.  
197 Outlier translations, defined as  $x$  or  $y$  translations greater than 3 scaled median absolute  
198 deviations within a local 10 image window in the stack, were corrected by linearly interpolating  
199 translations for adjacent images in the stack. In our data, outlier translations often occur in  
200 image slices without any sample present where the lack of image contents limits registration  
201 accuracy.

202  
203 While a rigid 2D registration approach is sufficient for channel alignment when samples are  
204 securely mounted, sporadic movement of some samples during long imaging sessions can  
205 result in not only shifting translation but also rotational drift. In these cases, performing  
206 registration relying solely on translation will result in only part of the target image aligning  
207 correctly to the nuclei reference at a given  $z$  position with the remaining misaligned target  
208 features appearing in  $z$  positions immediately above and/or below (Figure S1B). To correct for

209 these displacements, we applied a nonlinear 3D registration approach using the Elastix toolbox  
210 (Klein et al., 2010) between channels for each individual tile. Full image stacks were loaded and  
211 downsampled by a factor of 3 for the  $x/y$  dimensions to make the volume roughly isotropic and  
212 reduce computation time. Intensity histogram matching was then performed and a mask was  
213 identified for the nuclei reference channel using an intensity threshold that limits sampling  
214 positions in the background. Next, an initial 3D translational registration is performed on the  
215 entire image stack between the reference and the remaining channels. The stack is then  
216 subdivided into smaller chunks of 300 images and rigid registration is performed on each chunk  
217 to account for 3D rotation and achieve a more accurate initial alignment within local regions of  
218 the full stack. Finally, a nonlinear B-spline registration is performed on each chunk using an  
219 advanced Mattes mutual information metric to account for  $xy$  drift along the  $z$  axis and ensure  
220 precise alignment of image features. B-spline transformation grid points were set to be sparser  
221 along  $xy$  compared to  $z$  (800x800x8 voxels) as this setting well balances accurate alignment  
222 with computational cost while also preventing local warping of background intensities. To  
223 maintain consistency and ensure accurate alignment in all images, the non-rigid alignment  
224 method was used for all samples prior to downstream analyses.

## 225 Iterative Image Stitching

226 A custom 2D iterative stitching procedure was used to assemble whole brain images at high  
227 resolution. First, an optimal pairwise  $z$  correspondence along the axial direction was determined  
228 for adjacent tile stacks by exhaustive image matching for the horizontally and vertically  
229 overlapped candidate regions. Specifically, a sample of 10 evenly spaced images were taken  
230 within a stack and registered to every  $z$  position within a 20 image window in the adjacent stack  
231 using phase correlation. The displacement in  $z$  with the highest count of peak correlations  
232 among the 10 images was presumed to represent the best  $z$  correspondence. The difference in  
233 correlation between the best and the 2<sup>nd</sup> best  $z$  displacement was used as a weight for the  
234 strength of the correspondence, with a larger difference representing a stronger  
235 correspondence. This resulted in 4 matrices: pairwise horizontal and vertical  $z$  displacements  
236 and their corresponding weights. To determine the final  $z$  displacement for each tile, we  
237 implemented a minimum spanning tree (Kruskal, 1956) using displacements and their weights  
238 as vertices and edges, as previously implemented (Chalfoun et al., 2017).

239  
240 An intensity threshold to measure the amount of non-background signal was determined by  
241 uniformly sampling 5% of all images and calculating the median intensity. The starting point for  
242 iterative stitching going up/down the stack was selected at a  $z$  position with non-background  
243 signal (set to 1 standard deviation above the darkfield intensity) present in all tiles. Translations  
244 in  $xy$  were calculated using phase correlation and further refined using the Scale Invariant  
245 Feature Transform (SIFT) algorithm (Lowe, 2004). The top left tile was set as the starting point  
246 for tile placement for each stitching iteration. This ensures stitched images would not be shifted  
247 relative to each other along the  $z$  axis. Tiles were blended using sigmoidal function to maintain  
248 high image contrast in overlapping regions. Spurious translations, defined as translations  
249 greater than 5 pixels in  $x$  or  $y$  from the previous iteration, in images that lacked image content  
250 were replaced by translation results from the previous iteration.

## 251 Image Registration to ARA Using Point Correspondence

252 Volumetric image registration was performed using Elastix to measure the correspondence  
253 between the stitched TO-PRO-3 channel in the tissue cleared samples and the Nissl-stained  
254 Allen Reference Atlas (ARA) (Dong, 2008; Lein et al., 2007). The atlas and corresponding  
255 volume annotations from Common Coordinate Framework v3 were downloaded using the Allen  
256 Software Development Kit (SDK) (<https://allensdk.readthedocs.io/>) at 10  $\mu\text{m}/\text{voxel}$  resolution. In  
257 each registration procedure, the ARA was downsampled to 25  $\mu\text{m}/\text{voxel}$  resolution to perform  
258 registration and the resulting transformation parameters were rescaled and applied to the  
259 annotation volume at the native 10  $\mu\text{m}/\text{voxel}$  resolution.

260  
261 For registration without point guidance, an affine followed by B-spline transformation sequence  
262 was applied along 3 resolution levels to each sample using advanced mattes mutual information  
263 (MMI) as the sole metric to estimate spatial correspondence (as done previously in (Renier et al.  
264 2016). For points-guided registration, we first manually placed 200 landmarks within both the  
265 ARA and our to-be-registered nuclei reference image, using the BigWarp plugin in Fiji (Bogovic  
266 et al., 2016). The majority of points were located within or around the cortex, as this was our  
267 region of interest and contained the largest deformations in the *Top1* cKO samples (Figure S4).  
268 The same set of reference point coordinates in the ARA were selected for each sample and  
269 used as input points in Elastix for affine and B-spline registration along 3 resolution levels.  
270 Estimates of spatial correspondence for points-guided registration was driven by a hybrid metric  
271 based on (1) minimizing the point distances between two images and (2) maximizing the voxel-  
272 wise image similarity between two images which is measured by mattes mutual information  
273 (MMI). For affine registration, voxel-wise similarity (based on MMI) was ignored and only points  
274 distance was used to estimate global translation, rotation, and scaling transformations. For B-  
275 spline registration, we gradually increased the influence of voxel-wise similarity in the hybrid  
276 metric during the registration sequence from coarse to fine resolution (1:0.2, 1:0.4, 1:0.6;  
277 MMI:Point Distance weight). The inverse of the final transformation parameters was then  
278 calculated using a displacement magnitude penalty cost function (Metz et al., 2011) and applied  
279 to the Allen Mouse Brain Common Coordinate Framework v3 annotation volume to assign  
280 anatomical labels for each voxel in the native sample space. While a more direct approach  
281 would be to register the ARA to the sample, we found that registering the sample to the ARA  
282 and calculating the inverse achieved slightly higher accuracy in *Top1* cKO brains (data not  
283 shown). For WT samples, we registered directly to the ARA without point guidance as we found  
284 this produced similar accuracy but slightly higher consistency in structure volumes between  
285 samples (Figure S3).

286  
287 To evaluate registration accuracy, 3D masks of the entire isocortex were manually labeled for  
288 each sample in Imaris (Bitplane) using the 3 acquired channels as markers to delineate cortex  
289 boundaries. Some cortical subplate structures, such as the claustrum, were included in the final  
290 mask as these were difficult to distinguish from the isocortex. The DICE similarity score was  
291 then calculated between each mask and all cortical structures in the registered annotation  
292 volume (Figure 2B) as a metric of registration accuracy.

## 293 Cortical Volume, Surface Area, and Thickness Measurements

294 Quantitative measurements for the volume, surface area, and thickness of 43 cortical areas  
295 defined in (Harris et al., 2019) and the full isocortex were calculated based on registered  
296 annotation volumes. The voxel sums (at  $10 \mu\text{m}^3/\text{voxel}$ ) represent the total volume of each  
297 structure. To calculate volumetric displacement for each sample relative to the Allen atlas, the  
298 spatial Jacobian was measured for each set of transformation parameters, which ranges from -1  
299 to 1, and represents voxel-wise local compression or expansion. Surface area for the isocortex  
300 was calculated based on MATLAB's implementation of Crofton's formula (Lehmann and  
301 Legland, 2012). The fraction of layer 1 boundary voxels over all boundary voxels was used to  
302 determine the area of only the outer cortical surface. This measurement was then further  
303 partitioned by the number of layer 1 boundary voxels for each individual structure. To calculate  
304 thickness, the center of mass for layer 1 and layer 6b were first calculated for each structure. A  
305 cubic spline was then fit to pass through the center of mass of the full volume and the 2 border  
306 voxels nearest to layer 1 and 6b centroids. Thickness was then measured based on the arc  
307 length of each spline. Average cortical thickness was weighted by the volume contribution of  
308 each structure.

## 309 Nuclei Detection

310 Imaging data for training the 3D-Unet model was acquired from 3 separate imaging experiments  
311 of TO-PRO-3 labeled nuclei across 5 different regions from the cortex of 2 WT brains. Images  
312 were captured at  $0.75 \times 0.75 \times 2.5 \mu\text{m}/\text{voxel}$  for training a high resolution model or  $1.21 \times 1.21 \times 4$   
313  $\mu\text{m}/\text{voxel}$  for training a low resolution model. A binary approximation of the nucleus volume was  
314 initially pre-traced using the cell detection component of the CUBIC-informatics pipeline  
315 (Matsumoto et al., 2019). Specifically, the thresholded Hessian determinant after Difference-of-  
316 Gaussian filtering was used to create an initial 3D mask of all nuclei in the image. Full images  
317 were then divided into patches of  $224 \times 224 \times 64$  voxels and preprocessed using min/max  
318 normalization. The corresponding 3D mask for each nucleus was reduced to its 2D component  
319 at the middle z position. Each patch was then manually inspected and corrected for  
320 segmentation error or incorrect shapes using BrainSuite v17a (Shattuck and Leahy, 2002) by 1  
321 rater (OK) to reduce person-to-person variability. The corrected 2D nuclei masks were then  
322 eroded by removing 40% of the outer edge pixels. Each patch was then subdivided into 4  
323 smaller patches of  $112 \times 112 \times 32$  voxels, with 1 out of the 4 patches being withheld for the  
324 validation set. The full dataset (training + validation) contained 16 patches at  $224 \times 224 \times 64$   
325 voxels for both the high (14,554 nuclei) and low resolution (53,993 nuclei) models. Nuclei at the  
326 edge of an image stack were also included in the training. Manually labeled data are available at  
327 <https://braini.renci.org/> using the Download Image service.

328  
329 A modified 3D-Unet architecture (Çiçek et al., 2016; Isensee et al., 2018) was used to identify  
330 the positions of cell nuclei in whole cortex images. We built upon and modified a previous Keras  
331 implementation of 3D-Unet for volumetric segmentation in MRI  
332 (<https://github.com/ellisdg/3DUnetCNN>) to detect binary masks of cell nuclei positions. As  
333 originally described (Isensee et al., 2018), the 3D-Unet architecture contains a series of context  
334 modules during the contracting path that encodes abstract representations of the input image,



335 followed by a series of localization modules on the upscaling path to localize the features of  
336 interest (Figure S4A). We similarly used a model with 5 context modules, residual weights, and  
337 deep supervision in the localization modules. The network was trained using 32 base filters on  
338 image patches of size 112x112x32 voxels with a batch size of 2. Training presumed over ~300  
339 epochs using an Adam optimizer with a dropout rate of 0.4 and an initial learning rate 0.002 that  
340 was reduced by a factor of 2 for every 10 epochs without the loss improving. Additional image  
341 augmentations were implemented during the training to make the model more generalizable.  
342 These include random image permutations, image blurring and sharpening, the addition of  
343 random noise, and intensity variations along x,y,z dimensions in the image patch. Random  
344 scaling was removed as we found that this decreased model performance.

345  
346 Nuclei detection accuracy was evaluated using an independent set of 5 images patches of TO-  
347 PRO-3- labeled nuclei where the full 3D volume of each nucleus was fully manually drawn with  
348 a unique index at 0.75x0.75x2.5  $\mu\text{m}/\text{voxel}$  resolution (~3,500 nuclei total). Each patch was  
349 sampled from a unique region within 1 WT cortex. Evaluation patches were initially delineated  
350 by 4 raters and further refined by 1 rater to reduce between-person variability. We compared our  
351 3D-Unet detection method with those used in 2 previously published pipelines for tissue cleared  
352 image analysis: ClearMap and CUBIC-informatics (Matsumoto et al., 2019; Renier et al., 2016).  
353 For ClearMap, we used voxel size and intensity thresholds after watershed, as described in  
354 the published implementation. Parameters for cell size and intensity were scaled accordingly to  
355 achieve the most accurate average cell counting results possible for all the patches tested.  
356 Similarly, intensity normalization and Difference-of-Gaussian scaling parameters used in  
357 CUBIC-informatics were adjusted according to image resolution. Filtering by intensity and  
358 structureness was also performed as described in the previous work (Matsumoto et al., 2019) .

359  
360 In our evaluation of nuclei detection, precision is the proportion of nuclei correctly predicted out  
361 of all nuclei predictions in an image patch. Precision is therefore calculated by counting the  
362 number of cells with multiple predicted centroids in 1 manually labeled nucleus volume as well  
363 as false positives cells called in the image background divided by the total number of nuclei  
364 detected and subtracting this number from 1. Recall is the proportion of all nuclei instances that  
365 were predicted. Recall was therefore calculated by counting the number of manually labeled cell  
366 volumes that lacked any predicted cell centroids divided by the total number of cells. The  
367 majority of false negative cases were due to touching nuclei. Nuclei whose centroid were within  
368 3 voxels of the image border were excluded from the evaluation.

369  
370 Whole brain TO-PRO-3 images were divided into chunks of 112x112x32 voxels to be fed into  
371 the trained 3D-Unet model for prediction of cell centroids. An overlap of 16x16x8 voxels was  
372 used between adjacent chunks to minimize errors from nuclei at chunk edges. Centroid  
373 positions falling in a region less than half the overlap range (i.e. <8 pixels from xy border or <4  
374 pixels from z border) were assumed to be counted in the adjacent overlapping chunk and were  
375 removed. Additionally, a nearest neighbor search using kd-trees (Bentley, 1975) was performed  
376 to remove duplicate centroids within 1.5 voxels of each other, ensuring centroids in overlapping  
377 regions were not counted multiple times. Increasing overlap did not significantly affect the final

378 cell counting results (data not shown). Total computation time for detecting all cortical nuclei in 1  
379 WT brain hemisphere was ~2.5 hours using a single GPU.

### 380 Cell-type Classification

381 To classify cell-types, we took a supervised approach by training a linear Support Vector  
382 Machine (SVM) classifier using MATLAB's Statistics and Machine Learning Toolbox on a set of  
383 intensity, shape, and annotation features within a 2D patch surrounding each centroid. First,  
384 channel intensities were measured at centroid positions for each channel. Cells with intensities  
385 below the median for both Ctip2 and Cux1 were presumed negative for both markers and  
386 removed from model training and classification (~25% of cells). In the remaining cells, we took a  
387 uniform, random sample of 1,000 cells from each brain image dataset and retained 2D patches  
388 (13x13 pixels) around centroid positions. Manual classification required >1 hour per dataset  
389 using a custom NuMorph function that allows fast navigation between cell patches. For each  
390 patch, we recorded several intensity measurements (max, mean, standard deviation, middle  
391 pixel, middle pixel/edge pixel) and applied Otsu thresholding to capture shape measurements  
392 (total filled area, inner filled area) in each channel. These were also combined with categorical  
393 annotations for cortical layer (L1, L23, L4, L5, L6a, L6b) and cortical area (Prefrontal, Lateral,  
394 Somatomotor, Visual, Medial, Auditory; defined in (Harris et al., 2019)). Cells were then manually  
395 classified into 4 classes: (1) Ctip2-/Cux1-, (2) Ctip2+/Cux1-, (3) Ctip2-/Cux1+, (4) Outlier. The  
396 outlier class was annotated according to 4 additional subdivisions due to differences in intensity  
397 features: (1) Ctip2+/Cux1+, (2) Pial surface cell, (3) TO-PRO-3-/Ctip2-/Cux1- (4) Striatal cell  
398 (only present in *Top1* cKO from residual registration error near white matter boundary). The  
399 SVM model was then trained using all intensity, shape, and annotation features. Model  
400 accuracy was evaluated using 5-fold cross-validation and applied to the remaining cells for  
401 classification. Due to differences in labeling intensity between samples, we trained a new model  
402 for each sample instead of aggregating annotation data.

403  
404 We compared supervised cell classification with an unsupervised approach based on modeling  
405 fluorescence intensities at centroids positions as Gaussian mixtures (GM) for Ctip2 and Cux1.  
406 After Z normalization, high intensity cells ( $Z > 5$  and  $Z < -5$ ) winsorized and outliers expressing  
407 both markers near the sample edge were removed. GM model fitting was then performed  
408 separately on normalized Ctip2 and Cux1 intensities using 2 or 3 components (whichever had  
409 higher accuracy by visual inspection) for 20 replicates using parameters initialized by k-  
410 means++ (David Arthur, 2007). Due to spatial variation in gene expression, we stratified GM  
411 model fitting to 6 general areas defined in (Harris et al., 2019) according to each cell's structural  
412 annotation to further improve accuracy. We then calculated posterior probabilities of each cell  
413 being positive for either marker. Cells with a posterior probability greater than 0.5 of not being  
414 background were classified as positive. As the vast majority of neurons do not co-express Ctip2  
415 and Cux1 (Molyneaux et al., 2007), we filtered Ctip2+/Cux1+ cells according to their layer  
416 annotation. Cells in L1-L4 with  $P(\text{Cux1}) > P(\text{Ctip2})$  were classified as Cux1+ and cells in L5-L6b  
417 with  $P(\text{Ctip2}) > P(\text{Cux1})$  were classified as Ctip2+. The remaining Ctip2+/Cux1+ cells were  
418 classified as outliers.

## 419 Quantification, Statistical Analysis, and Visualization

420 Final cell-type counts were summed for each annotation in the cortex according to its structure  
421 tree hierarchy. In our analysis, we chose to compare either 43 cortical areas defined in (Harris  
422 et al., 2019) or a more broad grouping of 16 regions at the previous level in the structure  
423 hierarchy. Statistics, including mean counts, standard deviation, fold change, raw p values, and  
424 false discovery rate (FDR) adjusted p values (Benjamini-Hochberg;  $FDR < 0.05$ ), were  
425 calculated in MATLAB and exported for plotting using custom R scripts and customized slice  
426 visualization. Structure volumes were also used to calculate cell density statistics. Unless stated  
427 otherwise, descriptive statistics in the main text and error bars in figure plots represent mean  $\pm$   
428 standard deviation.

429  
430 2D slice visualizations were created using a custom MATLAB program based on the  
431 allenAtlasBrowser in the SHARP-Track tool (Shamash et al., 2018). Structure annotations were  
432 downsampled along the anterior-posterior axis to reduce memory overhead for smoother  
433 performance and colored by volume, cell count, or cell density statistics. Additional  
434 visualizations for point clouds and surface volumes were created using custom MATLAB scripts  
435 and are available in the NuMorph package. Additional animations were generated in Imaris  
436 (Bitplane) after importing cell centroid position as “spots” objects.

## 437 Spatial Gene Expression Correlation

438 Fold change in cell counts between WT and *Top1* cKO were correlated with spatial gene  
439 expression based on *in situ* hybridization measurements from the Allen Mouse Brain Atlas (Lein  
440 et al., 2007). Expression grid data from sagittal and coronal sections were downloaded using  
441 the Allen SDK. Expression energy for each gene was first Z-scored across all brain structures  
442 and cortical regions were retained for analysis. Duplicate sections for the same gene were  
443 combined by taking the mean Z score for each structure across sections. We filtered out any  
444 gene that did not have expression data in all cortical structures and removed genes with Z  
445 scores less than 1 in all structures as these represent genes with consistently low cortical  
446 expression or with low congruence between duplicate sections. For the remaining genes, we  
447 applied a robust sigmoidal transformation as described in (Fulcher and Fornito, 2016) to  
448 account for the presence of outliers in ISH expression data. As certain cortical regions also have  
449 greater cell density and therefore greater total ISH energy, we conducted an additional Z score  
450 normalization across cortical regions to have the same average total gene expression.

451  
452 To reduce known false positive associations from gene-gene coexpression (Fulcher et al.,  
453 2020), we ran comparisons to ensemble-based random null models generated using the Gene  
454 Category Enrichment Analysis toolbox  
455 (<https://github.com/benfulcher/GeneCategoryEnrichmentAnalysis>). Null distributions were  
456 generated for GO categories containing between 10 and 200 genes by 10,000 random samples  
457 to create a Gaussian distribution estimate of each GO null distribution. In total, we used null  
458 models for 4,186 GO categories based on expression of 10,945 genes across 38 cortical  
459 structures. Correlations between spatial gene expression and relative cell count differences  
460 were tested and corrected for multiple-hypothesis testing using a false discovery rate of 0.05.

461 Additional annotations for gene length comparisons were downloaded from Ensembl  
462 (Cunningham et al., 2019). The Spearman correlation between each gene's expression and cell  
463 count or density differences across cortical regions was measured and binned by gene length  
464 based on the longest isoform for each gene. The mean and standard deviation of all correlation  
465 coefficients in each bin (<100kb or >100kb) was used to compare correlation coefficients  
466 between bins (Welch's t-test). A list of differentially expressed genes in *Top1* cKO cortex as  
467 measured by scRNA-seq was acquired from (Fragola et al., 2020) for additional comparisons.

## 468 Data and Code Availability

469 NuMorph source code is available at <https://bitbucket.org/steinlabunc/numorph/>. Manually  
470 labeled annotations for 3D-Unet training and raw light-sheet images are available at  
471 <https://braini.renci.org/> through the "Download Image" service.

## 472 Results

### 473 iDISCO+ Reveals Neuronal Cell-type Deficits in the *Top1* cKO Cortex

474 A previous study demonstrated that deletion of *Top1* in postmitotic excitatory neurons within the  
475 cortex and hippocampus results in massive neurodegeneration in these structures by postnatal  
476 day 15 (P15) (Fragola et al., 2020). Interestingly, while all cortical layers were affected by *Top1*  
477 deletion, the lower cortical layers (Layers 5-6) showed a noticeably greater reduction in  
478 thickness and cell count compared to the upper cortical layers (Layers 2-4) (Fragola et al.,  
479 2020). These observations however were limited to the somatosensory cortex, which itself is a  
480 large structure that can be further decomposed into multiple functional regions. To evaluate the  
481 effects of *Top1* deletion on excitatory neuron cell-types throughout all cortical structures, we  
482 performed iDISCO+ (Renier et al., 2016) to clear and image the *Top1* cKO  
483 (*Neurod6<sup>Cre/+</sup>::Top1<sup>fl/fl</sup>*) mouse. We chose to use iDISCO+ among other tissue clearing  
484 techniques due to its demonstrated compatibility with antibody labeling, minimal tissue  
485 expansion or shrinkage, and simplified protocol (Renier et al., 2016). To go beyond qualitative  
486 evaluation, we proceeded to develop cell detection and image registration tools that could  
487 accurately quantify the number of upper layer and lower layer neurons in each cortical region in  
488 *Top1* cKO mice (Figure 1A).

489  
490 We processed one brain hemisphere from four wild-type (WT) and four *Top1* cKO mice at P15 -  
491 when the *Top1* cKO had displayed strong, bilateral deficits in brain structure (Fragola et al.,  
492 2020). We labeled layer-specific cell-types using antibodies for Cux1 (upper layer neuron  
493 marker) and Ctip2 (lower layer neuron marker) in addition to staining all cell nuclei with TO-  
494 PRO-3 (TP3) during iDISCO+ processing. After clearing, samples were imaged using the  
495 Ultramicroscope II - one of the most widely used commercial light-sheet microscopes for  
496 imaging cleared tissues (Cai et al., 2019; Ertürk et al., 2012; Kirst et al., 2020; Liebmann et al.,  
497 2016; Pan et al., 2016; Renier et al., 2016; Susaki et al., 2015; Tainaka et al., 2014; Ye et al.,  
498 2016). The *Top1* cKO hemispheres displayed a noticeable reduction in overall cortical volume  
499 (Figure 1B). During light-sheet imaging, there is a well known trade off between optical  
500 resolution, particularly in the axial (z) dimension, and imaging speed. While the Ultramicroscope

501 It features axial sweeping to maintain relatively even z resolution throughout the field of view  
502 (Dean et al., 2015), the additional mechanical movement of the light-sheet significantly reduces  
503 the imaging rate. After testing various imaging schemes, we imaged at 1.21x1.21x4 ( $\mu\text{m}/\text{voxel}$ )  
504 resolution with a light-sheet thickness of 9  $\mu\text{m}$ . The resulting images provided sufficient  
505 resolution to visually delineate cell nuclei in the cortex (Figure 1C) while limiting imaging time to  
506 ~20 hours for all 3 channels in 1 WT hemisphere (~12 hours for *Top1* cKO).

507  
508 Prolonged imaging of cleared tissue samples can induce several artifacts over the course of  
509 image acquisition. In particular, drift in the sample or aberrant microscope stage movement can  
510 cause misalignment between image tile positions within and between channels. These issues  
511 become more pronounced at higher optical resolution where slight variations can prevent  
512 colocalization of cell nuclei with their respective immunolabeled markers. To ensure correct  
513 alignment between channels, we applied a series of rigid and non-rigid registration steps using  
514 the Elastix toolbox (Klein et al., 2010) to map the *Cux1* and *Ctip2* channels onto the TO-PRO-3  
515 channel without inducing non-specific local background warping (Figure S1). We also found that  
516 many of the commonly used programs for performing 3D image stitching (Bria and Iannello,  
517 2012; Hörl et al., 2019) did not accurately align adjacent tile stacks due to spurious stage  
518 movement, which has been noted by other groups (Kirst et al., 2020). To ensure accurate image  
519 reconstruction, we applied a simplified iterative 2D stitching procedure that uses scale-invariant  
520 feature transforms (Lowe, 2004) to produce continuous images without cell duplication along tile  
521 edges (Figure S2). Finally, differences in fluorescence intensity caused by light attenuation and  
522 photo bleaching during the course of imaging can result in uneven brightness between image  
523 tile positions. To ensure uniform signal across tiles, we measured the differences in image  
524 contrast in overlapping tile regions to estimate and correct for variations in signal intensity  
525 among tile stacks (Figure S1D).

526  
527 Completion of the preprocessing steps described above resulted in aligned, fully stitched 3  
528 channel images and datasets <1TB per sample (~360GB for WT and ~170GB for *Top1* cKO).  
529 The *Top1* cKO hemispheres displayed clear reductions in thickness throughout the cortex  
530 (Figure 1D). While all cortical layers showed some amount of degeneration, Layer 5 and Layer 6  
531 neurons seemed to be more severely depleted (Figure 1E) and we hypothesized that certain  
532 cortical areas may be differentially impacted as well.

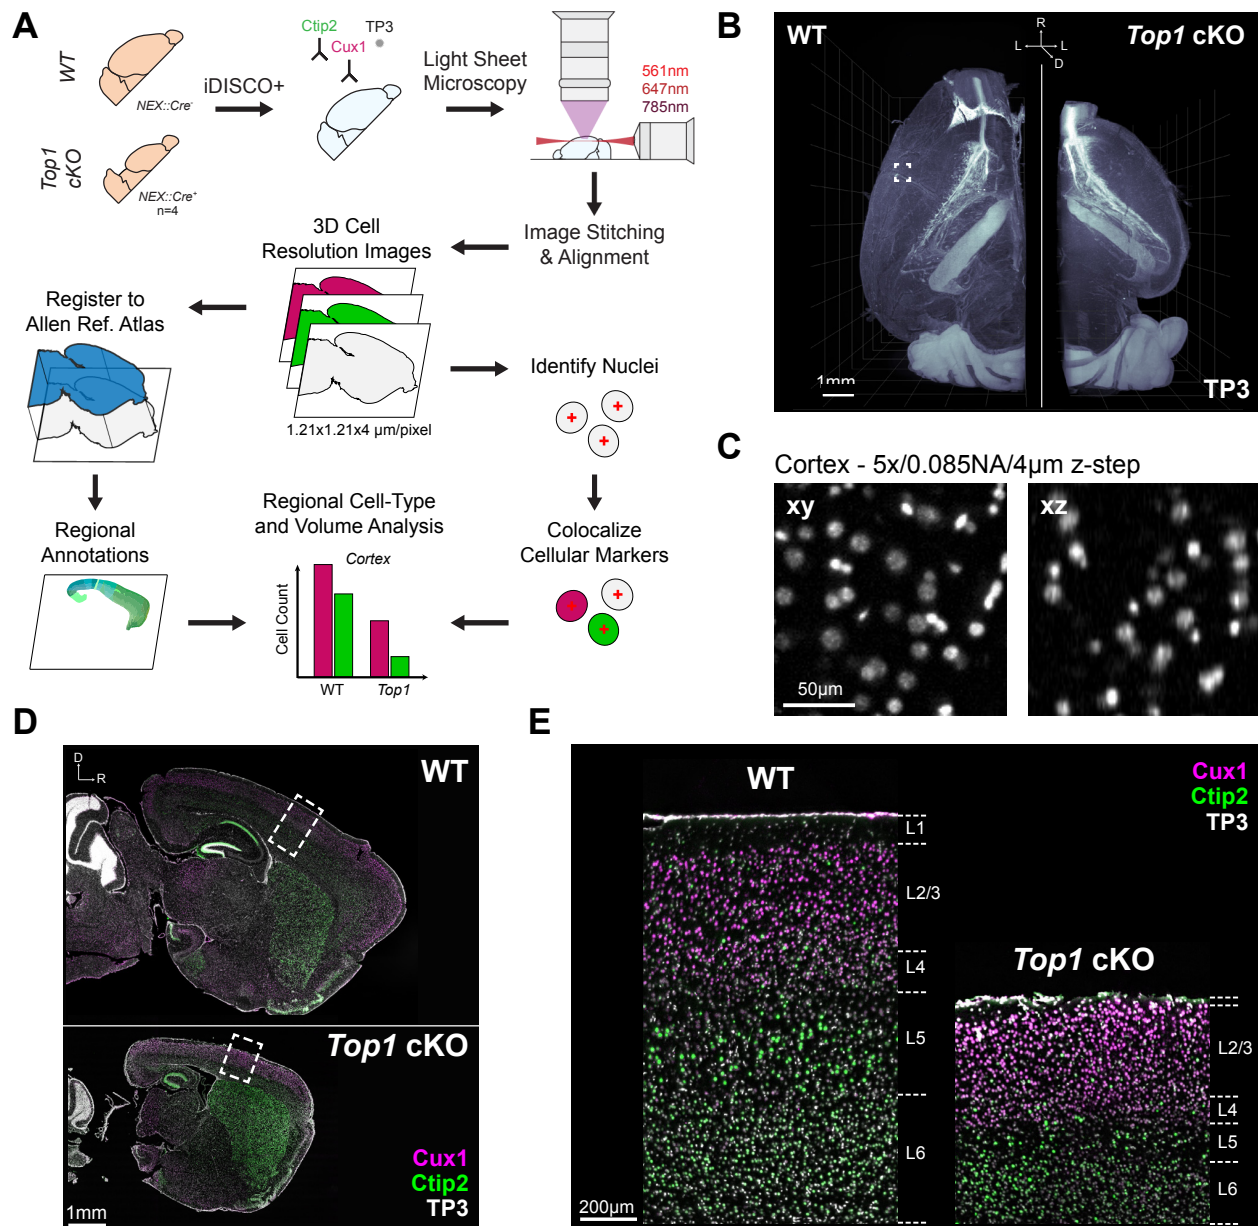

533 **Figure 1. Cellular Resolution Analysis of Brain Structure Phenotypes for Tissue Cleared**  
 534 **3D Brain Images.**

535 A. Overview of tissue processing, imaging, and image analysis procedures. B. 3D rendering of  
 536 cell nuclei in WT and *Top1* cKO samples. C. Example of TO-PRO-3 (TP3) labeled nuclei within  
 537 WT cortex captured at sufficient lateral (xy) and axial (xz) resolution for cell quantification.  
 538 D. Sagittal sections of TO-PRO-3 nuclear staining and immunolabeling for cell-type specific  
 539 markers Ctip2 (lower layer neuron) and Cux1 (upper layer neuron) in WT and *Top1* cKO  
 540 samples. E. Zoomed in images of boxed cortical areas in D demonstrating channel alignment  
 541 and showing the expected localization of upper and lower layer markers.  
 542 Scale: 1 mm (B,D), 50 μm (C), 200 μm (E).

543 Point Correspondence Improves Image Registration for Structures with Large  
544 Morphological Differences

545 Because of the significant differences in gross morphology within the *Top1* cKO brain, image  
546 registration was not accurate using only intensity-based mutual information metrics (Figure 2A).  
547 To improve registration accuracy of the *Top1* cKO brain, we manually selected up to 200 points  
548 at distinguishable structure landmarks in the Nissl stained ARA and their corresponding  
549 locations in the TO-PRO-3 nuclei channel for each sample. Point locations were positioned  
550 primarily around the cortex as this was our region of interest (Figure S3). Using Euclidean point  
551 distances as an additional metric during the registration process significantly improved cortical  
552 annotation when compared to a manually delineated mask (Figure 2A). Increasing the number  
553 of points resulted in higher DICE similarity coefficient scores in *Top1* cKO samples (*Top1* cKO  
554 MMI, mean = 0.526, s.d. = 0.189; *Top1* cKO MMI + 200 Pts, mean = 0.890 s.d. = 0.013)  
555 indicating improvements in registration accuracy (Figures 2B and S3C). These results show that  
556 point correspondence can be used to better register mouse models with large structural  
557 variation.

558  
559 Using the spatial deformation fields generated after image registration, we analyzed which  
560 areas in the *Top1* cKO cortex exhibited the largest changes in volume relative to WT. While the  
561 cortex as a whole showed a large reduction in volume (mean = 80%, s.d. = 3.7%,  $p < 0.001$ ),  
562 we observed slightly greater decreases in frontal regions, such as the orbitofrontal (ORB) and

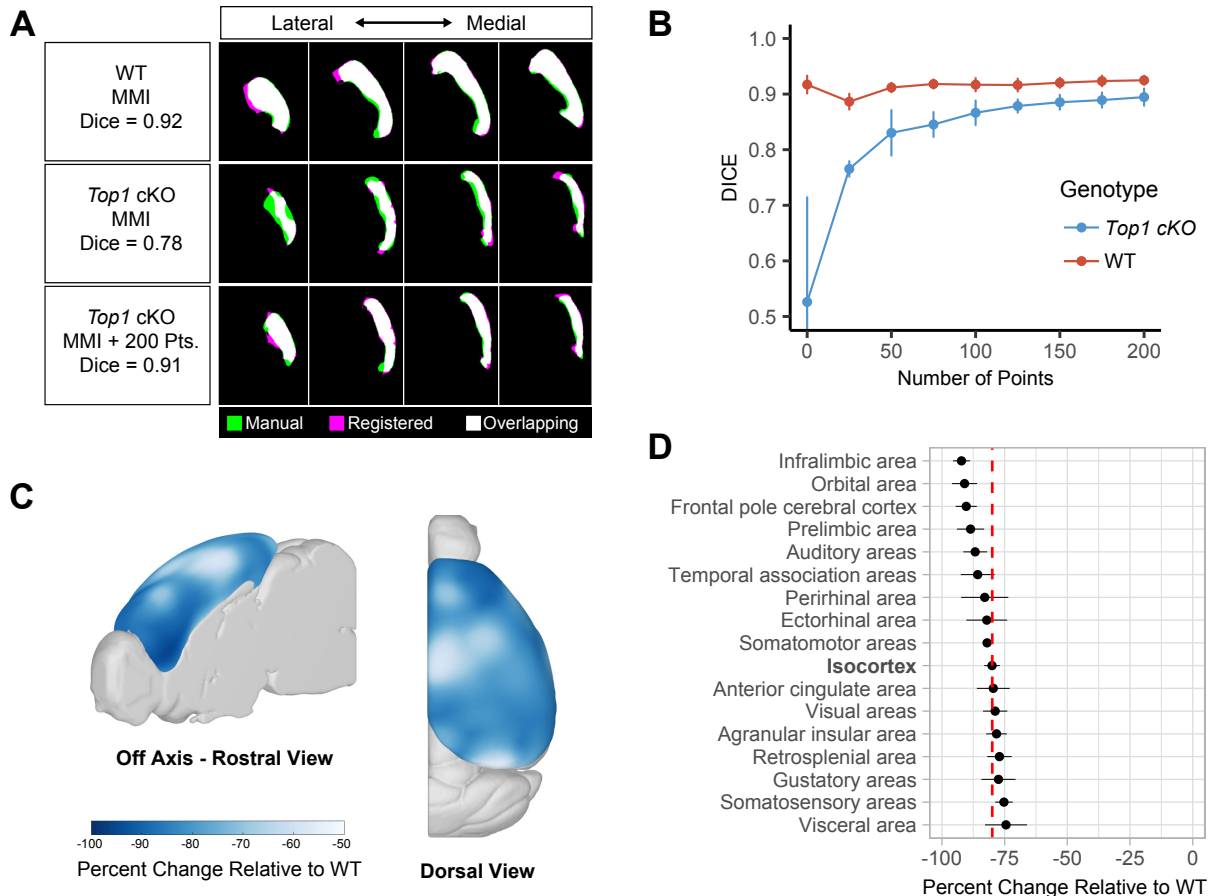

563 **Figure 2. Improved Image Registration Using Corresponding Points Identifies Region-**  
564 **Specific Deficits.**

565 A. Cortical masks from registered WT and *Top1* cKO brain images (Magenta) compared with  
566 manual labelled traces (Green). Mattes mutual information (MMI) was used as the primary  
567 registration metric with additional point correspondence to guide registration in the *Top1* cKO  
568 case. B. DICE scores measuring cortical registration accuracy in WT and *Top1* cKO samples  
569 based on the number of points used to guide registration. Measurements with no corresponding  
570 points were made using affine + b-spline registration without a points distance metric. Data  
571 represented as mean  $\pm$  standard deviation. C. Voxel-wise differences in cortical volumes  
572 between *Top1* cKO and WT samples. D. Percent change in cortical region volumes in *Top1*  
573 cKO samples compared to WT. Dashed line indicates average change in the entire cortex. Data  
574 represented as mean  $\pm$  SEM.

575  
576 infralimbic (ILA) areas, as well as certain lateral regions near the temporal association area  
577 (TEa) (Figures 2C and 2D). This suggests that the neuronal cell-types within these structures  
578 may be more susceptible to degeneration upon *Top1* deletion.

579 **3D-Unet Accurately Quantifies Cell Nuclei in the Cortex**

580 3D cell segmentation of tissue cleared images can be difficult due to the density of cells in the  
581 brain, limits of imaging resolution, and overall data complexity. Here we implemented a deep  
582 learning model, based on a 3D version of the popular U-Net framework (3D-Unet) (Çiçek et al.,  
583 2016; Isensee et al., 2018), to accurately quantify the total number of cell nuclei marked by TO-  
584 PRO-3 staining within the cortex. We generated two sets of manually labeled nuclei: (1) For  
585 training, ~67,000 cortical nuclei were manually delineated from 256 training image patches  
586 (112x112x32 voxels/patch) of cortical nuclei at either high (0.75x0.75x2.5  $\mu\text{m}/\text{voxel}$ ) or low  
587 (1.21x1.21x4  $\mu\text{m}/\text{voxel}$ ) spatial resolutions. To increase manual delineation efficiency, we  
588 focused only on cell detection by delineating a 2D binary mask at the middle Z position to be  
589 used as a marker for each cell nucleus. (2) For evaluation, an independent set of ~3,500  
590 manually delineated nuclei were used where the full 3D extent of the nucleus was labeled in  
591 order to determine accuracy of predicted centroid placement. Cell marker predictions within  
592 each 3D patch were then thresholded and analyzed for connected components to calculate final  
593 cell centroid positions (Figure 3A).

594  
595 Using the trained 3D-Unet model, we counted  $8.43(\pm 0.05)\times 10^6$  cells in the P15 WT cortex  
596 (Figure 3B), which was similar to previously published results in adult mice (Murakami et al.,  
597 2018). To evaluate cell detection accuracy, we compared precision and recall rates for detecting  
598 nuclei in the evaluation dataset using 3D-Unet and two previously published analysis tools for  
599 tissue cleared images with cell counting components: ClearMap and CUBIC Informatics  
600 (CUBIC). In our tests, 3D-Unet achieved the highest precision and recall rates in both high and  
601 low resolution images when the full training datasets were used (Figures 3C and 3D). At low  
602 resolution, 3D-Unet achieved significantly lower error rates compared to the next best  
603 performing method (CUBIC) at higher resolution ( $p = 0.043$ , CUBIC 0.75/3D-Unet 1.21;  $p <$   
604  $0.001$ , CUBIC 1.21/3D-Unet 1.21;  $p < 0.001$ , ClearMap 1.21/3D-Unet 1.21; McNemar's test).  
605 This indicates that, with sufficient training, deep neural networks can compensate for a lack of  
606 imaging resolution and achieve accurate cell quantification.



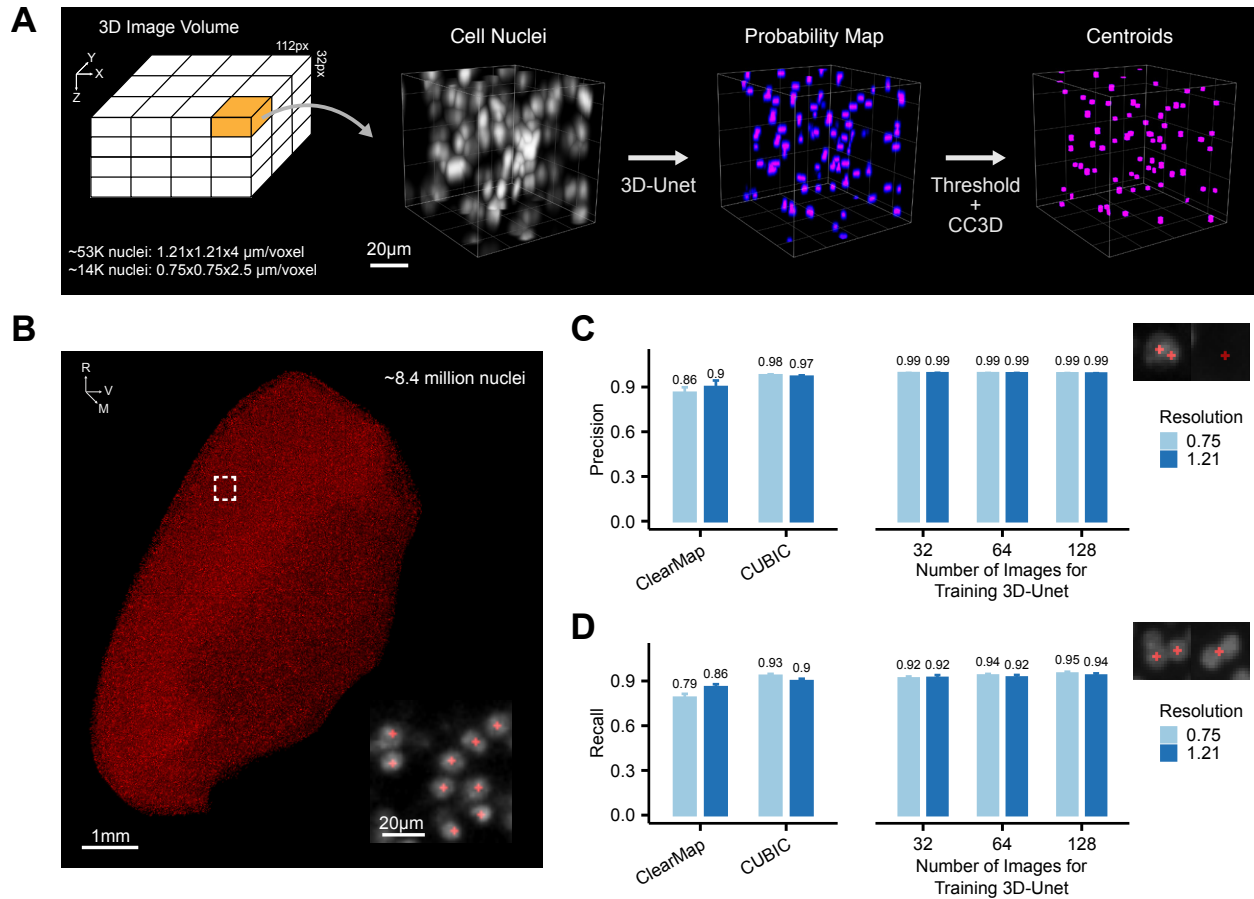

607  
 608 **Figure 3. Cell Detection Using 3D-UNET Shows Improved Accuracy Compared to Non-**  
 609 **learning Based Methods.**  
 610 A. Description of 3D-UNET approach for detecting cell centroids (CC3D: 3D Connected  
 611 Component Analysis). B. Cell centroids of WT cortical nuclei predicted by 3D-UNET. C-D.  
 612 Comparison of cell detection precision (C) or recall (D) at the indicated xy resolutions (µm/pixel).  
 613 Examples of misclassification instances contributing to false positive errors (C) or false negative  
 614 errors (D) are shown above. Data represented as mean ± standard deviation.  
 615

616 Lower Layer Neurons in the Frontal Cortex Are Preferentially Targeted by *Top1* Deletion  
 617 To quantify neuronal cell-types in WT and *Top1* cKO cortexes, we developed a supervised  
 618 Support Vector Machine (SVM) model to classify cell-types based on local intensity, shape, and  
 619 annotation features. We found that a supervised approach, after training on 1,000 nuclei in each  
 620 brain sample, achieved more accurate classification compared to an unsupervised mixture  
 621 model approach (Figure S5). After removing outliers and summing across cortical structures, we  
 622 counted  $1.74(\pm 0.07)\times 10^6$  Ctip2+ and  $1.95(\pm 0.05)\times 10^6$  Cux1+ in WT compared to  $0.30(\pm$   
 623  $0.08)\times 10^6$  Ctip2+ and  $0.73(\pm 0.11)\times 10^6$  Cux1+ in the *Top1* cKO (Figures 4A and 4B). Overall,  
 624 this constitutes an ~83% decrease in Ctip2+ cells and ~62% decrease in Cux1+ cells. When  
 625 compared to previous results in 2D sections from somatosensory cortex (Fragola et al., 2020),  
 626 we saw a similar bias towards lower layer neuron degeneration (Cux1/Ctip2 = 1.97 in 3D SSP;  
 627 2.33 in 2D), however with a larger reduction in total neuron counts. While this can be partially

628 attributed to differences in cell quantification methods, the increase in sampling depth from  
 629 volumetric analyses can also uncover larger effects in total cell count compared to serial 2D  
 630 analysis.  
 631

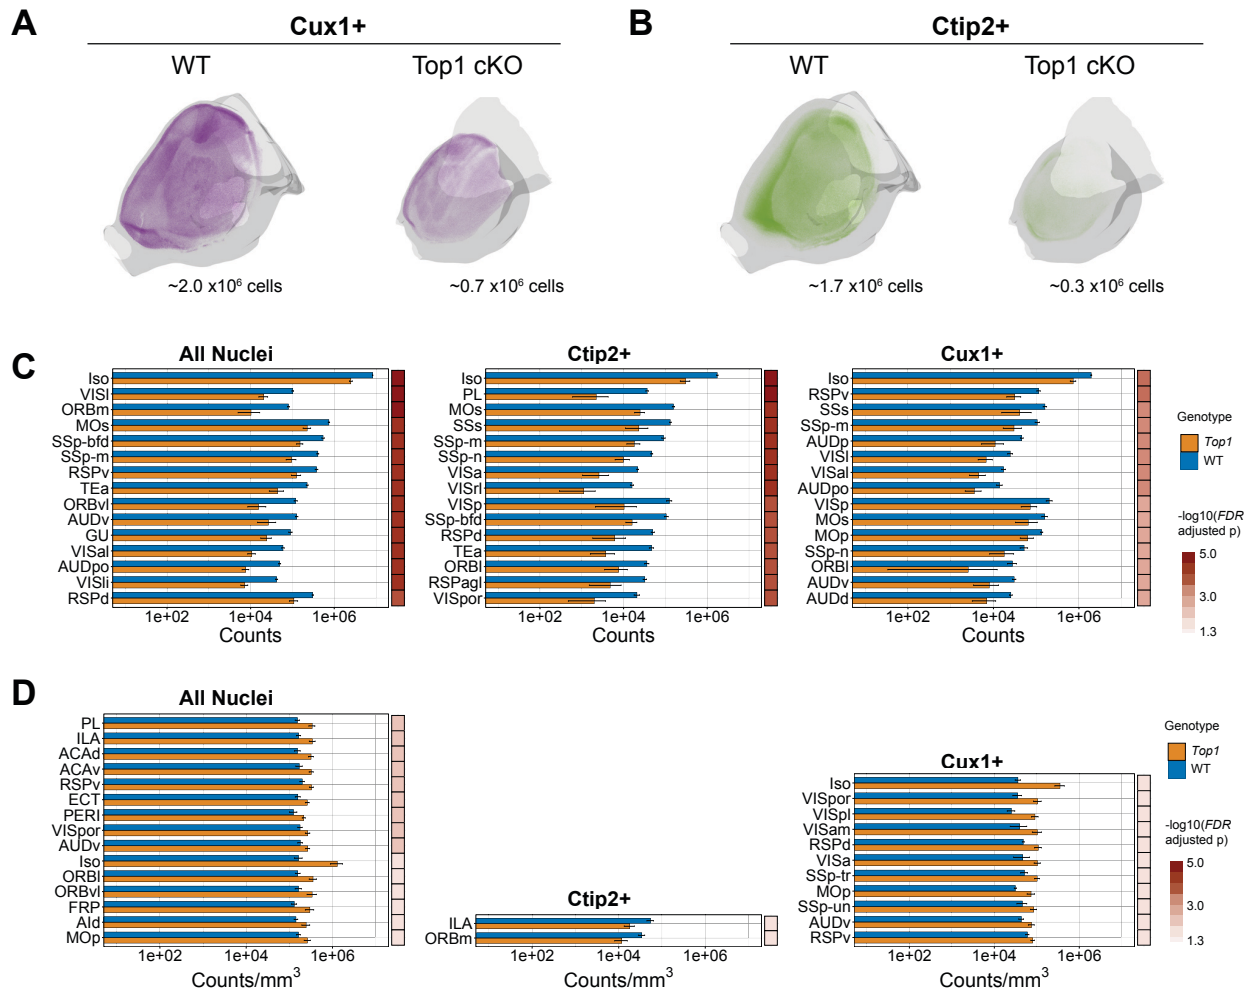

632 **Figure 4. *Top1* Deletion Induces Broad Degeneration of Neuronal Cell-types but**  
 633 **Increases Cell Density.**

634 A-B. Point cloud display of *Cux1*+ (A) or *Ctip2*+ (B) cells within WT and *Top1* cKO cortices.  
 635 C-D. Comparison of cell-type counts (C) or densities (D) between WT and *Top1* cKO across  
 636 cortical regions and the full isocortex. Displaying the top 15 structures (FDR < 0.05) binned by  
 637 significance level and sorted by absolute difference in count or density within each bin. Data  
 638 represented as mean  $\pm$  standard deviation and plotted on  $\log_{10}$  scale. Structure name  
 639 abbreviations provided in Table S1.  
 640

641 Next, we compared differences in cell counts and density for 43 cortical areas defined by  
 642 functional connectivity in the ARA (Harris et al., 2019) and the complete isocortex to see which  
 643 regions were most affected by *Top1* deletion. After correcting for multiple comparisons (FDR <  
 644 0.05), all but one of the 43 structures showed a significant decrease in total TO-PRO-3 cell  
 645 count indicating broad degeneration across all cortical areas in the *Top1* cKO model (Figure 4C  
 646 and 5). Among neuronal cell-types, we identified 25 and 41 structures with significant decreases

647 in Cux1+ and Ctip2+ cell counts, respectively. While many structures, including several areas in  
648 somatosensory cortex (SSp-n, SS-m, SSp-bfd), shared significant losses in both Cux1+ and  
649 Ctip2+ excitatory neurons, the largest reductions were seen in Ctip2+ cells localized in frontal  
650 areas, such as the prelimbic area (PL) and secondary motor area (MOs) not measured in  
651 previous work (Fragola et al., 2020). We then calculated cell density by normalizing counts to  
652 registered structure volumes. Interestingly, the majority of structures show significant increases  
653 in TO-PRO-3+ cell density (Figure 4D), suggesting that, in addition to cell loss, degeneration of  
654 neuronal processes is also contributing to differences in cortical structure. Structures with the  
655 largest increases were again localized in frontal regions, such as the prelimbic (PL), infralimbic  
656 (ILA), and orbitofrontal (ORB) areas, as well as medial regions, such as the anterior cingulate  
657 areas (ACA). Decreases in cell number also resulted in greater reductions in cortical surface  
658 area compared to cortical thickness (Figure S6). Taken together, these results show that, even  
659 in cases where genetic perturbation induces strong phenotypic effects such as in the *Top1* cKO  
660 model, NuMorph can reveal more localized differences in cell-type number within specific brain  
661 regions.  
662

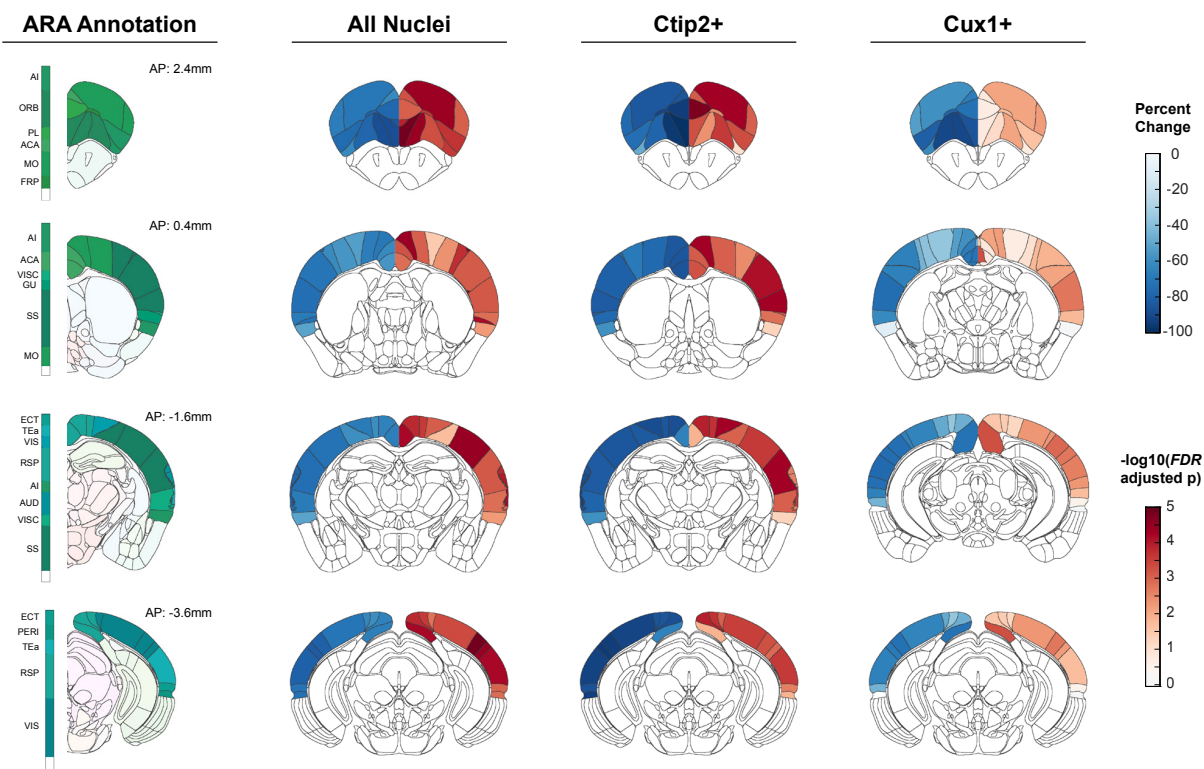

663 **Figure 5. Effects of *Top1* Deletion Vary Across Cortical Structures and Cell-types.**  
664 Coronal slice visualizations displaying percent change in cell count (left hemisphere) and FDR-  
665 adjusted p values (right hemisphere) from (Figure 4C). Colored ARA annotations at  
666 corresponding positions displayed for reference.

667 Neurodegeneration is Spatially Correlated with Genes Differentially Expressed in *Top1*  
668 cKO

669 Previous evidence suggests that lower layer neurons, particularly those in L5, are most  
670 susceptible to degeneration as a result of reduced expression of long, neuronal genes in the  
671 *Top1* cKO model (Fragola et al., 2020). While the severe structural deficits in *Top1* cKO  
672 precluded us from accurately quantifying L5 neurons in individual cortical regions, we found that  
673 regions with large L5 volumes in the ARA saw the greatest reductions in total structure volume  
674 in *Top1* cKO (Figure 6A). Furthermore, these regions also saw the largest increases in cell  
675 density (Figure 6B) suggesting local degeneration of neuronal processes. We then performed  
676 spatial correlations between regional cell count differences and gene expression using in-situ  
677 hybridization (ISH) data from Allen Mouse Brain Atlas (AMBA) (Lein et al., 2007). We tested  
678 whether the degree of *Top1* cKO induced structural change among cortical regions was related  
679 to the expression of long genes (i.e. genes >100kb) within those regions, as *Top1* is known to  
680 be a transcriptional regulator of long genes (King et al., 2013; Mabb et al., 2016). We found that  
681 in WT, regions with higher densities of Ctip2+ lower layer neurons were significantly associated  
682 with increased long gene expression (Figure 6C), providing further support that lower layer  
683 neurons express longer genes. Additionally, regions with larger reductions in cell numbers in  
684 *Top1* cKO were correlated with increased long gene expression (Figure 6D). Interestingly, fold  
685 change in Ctip2+ count differences saw the lowest positive correlation, likely because significant  
686 lower layer degeneration had already occurred by P15, minimizing variation between individual  
687 cortical regions. Gene Ontology analysis using random-null ensembles to overcome gene-  
688 enrichment bias (Fulcher et al., 2020), identified 113 functional annotations associated with  
689 greater neuronal loss, including several processes involved in axon guidance and extension  
690 (Figure S6D). We then searched for spatial correlations with individual genes differentially  
691 expressed in the P7 *Top1* cKO cortex as measured by scRNA-seq (Fragola et al., 2020).  
692 Among the 125 differentially expressed genes in *Top1* cKO that also contained ISH signatures  
693 in the AMBA, 5 were significantly correlated with relative difference in excitatory neuron count  
694 (Figure 6E). The most significant gene, S100a10 (also known as p11), is predominantly  
695 expressed by L5a corticospinal motor neurons in the cortex (Arlotta et al., 2005; Milosevic et al.,  
696 2017). Large reductions in Ctip2+ neurons in the *Top1* cKO secondary motor area (MOs) and  
697 other frontal areas where S100a10 is highly expressed, suggest that changes in S100a10  
698 expression may increase susceptibility for L5 degeneration in these regions (Figures 6F and  
699 6G). These results demonstrate how existing spatial gene expression resources can be  
700 leveraged with cleared tissue analysis to identify the specific genes, cell-types, and biological  
701 processes contributing to gene-structure associations.

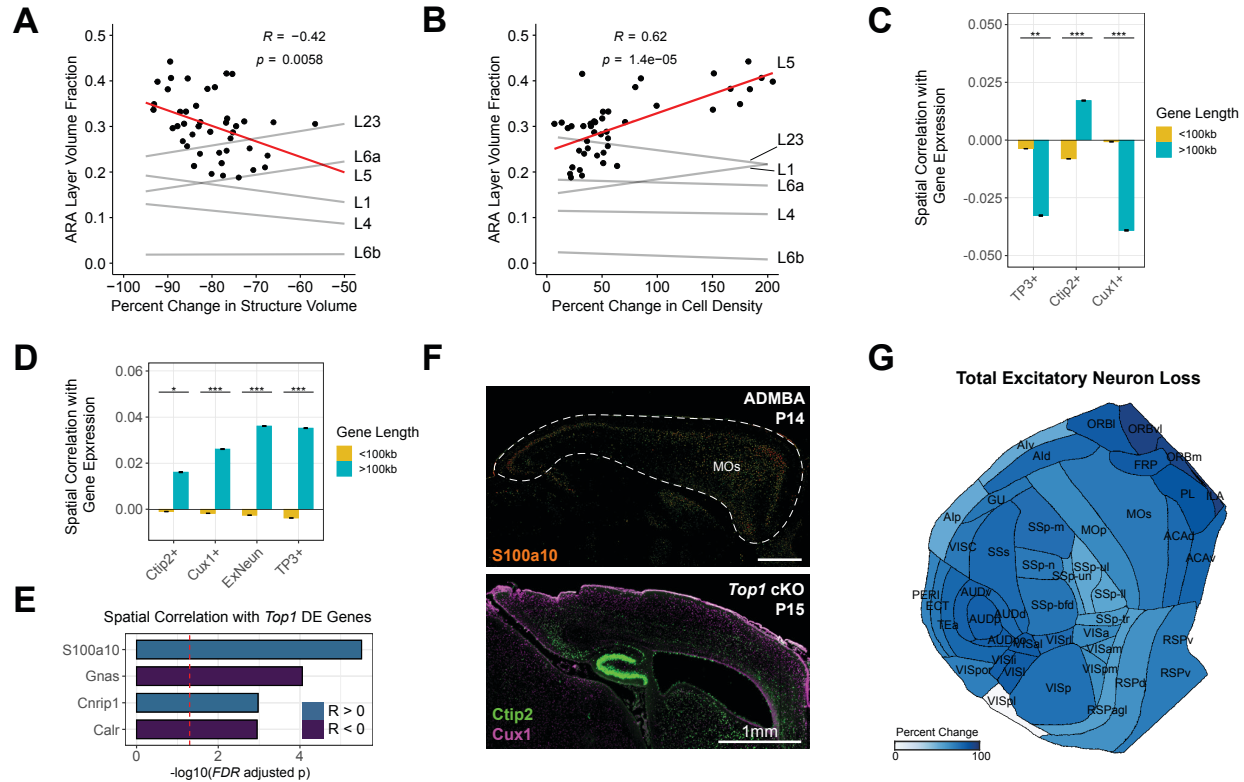

702 **Figure 6. Effects of *Top1* Deletion Are Associated with Spatial Patterns of Gene**  
 703 **Expression.**

704 A-B. Association between structure volume (A) and cell density (B) in *Top1* cKO with L5 volume  
 705 as a fraction of total volume in the ARA. (R: Spearman correlation coefficient). C-D. Association  
 706 between spatial gene expression and WT cell density (C) or negative fold change in cell count  
 707 between *Top1* cKO and WT (D). Spearman correlation coefficients, binned by gene length, for  
 708 each gene's expression across cortical regions were used for comparisons. Increased  
 709 correlation indicates stronger association with cell loss in (D). TP3+ indicates all cells and  
 710 ExNeun indicates excitatory neurons (i.e. Ctip2+ or Cux1+). Displaying mean  $\pm$  SEM. E. Genes  
 711 differentially expressed in *Top1* cKO excitatory neurons significantly correlated with relative  
 712 change in excitatory neuron count across cortical regions (Spearman; FDR < 0.05). F. ISH  
 713 expression of S100a10 at P14 in the Allen Developing Mouse Brain Atlas (ADMBA) with the  
 714 cortex outlined and a corresponding sagittal section of *Top1* cKO. (MOs: secondary motor  
 715 area). G. Flattened isocortex displaying percent change in excitatory neuron counts (i.e. Ctip2+  
 716 or Cux1+) in *Top1* cKO relative to WT.

## 717 Discussion

718 Tissue clearing methods provide a unique opportunity to explore the cellular organization of the  
 719 entire 3 dimensional brain structure. However, the current computational tools for analyzing cell-  
 720 types in tissue cleared images have either been applied to sparse cell populations where  
 721 segmentation is less difficult (Renier et al., 2016; Yun et al., 2019) or taken advantage of tissue  
 722 expansion and custom-built light sheet systems to increase spatial resolution (Matsumoto et al.,  
 723 2019; Murakami et al., 2018). Here, we present NuMorph, a computational pipeline for

724 processing and quantifying nuclei within structures of the adult mouse brain acquired by  
725 conventional light-sheet fluorescence microscopy.

726  
727 In the course of developing NuMorph and an appropriate imaging protocol, a large emphasis  
728 was placed on outlining a reasonable compromise between cell detection accuracy, imaging  
729 time, and computational resources. With the imaging parameters used to resolve cortical nuclei  
730 in this study, WT brain hemispheres required 5-7 hours of imaging per channel, while end-to-  
731 end processing and analysis using NuMorph required ~1 day with a GPU-equipped workstation.  
732 By training a 3D-Unet model on a diverse set of manually labeled nuclei from multiple imaging  
733 experiments, we were able to achieve effectively equivalent error rates at this resolution  
734 compared to 1.6x higher resolution ( $p = 0.91$ , 3D-Unet 0.75/3D-Unet 1.21; McNemar's test) that  
735 would have otherwise required significantly longer imaging times and expanded data size by  
736 ~4x for a whole hemisphere acquisition. We expect cell detection accuracy using the training  
737 dataset generated here will remain high for analyzing other brain regions with similar cell  
738 density, while supplementation with additional training data may be needed for denser  
739 structures such as the hippocampus. Furthermore, NuMorph provides additional features and  
740 flexibility such as (1) targeting analyses to specific structures after registration to avoid  
741 unnecessary computation time, (2) detecting cells directly by nuclear protein marker expression  
742 without DNA staining, and (3) classifying cell-types by cellular markers using either supervised  
743 or unsupervised methods.

744  
745 *Top1* is critical for maintaining genomic stability and regulating the expression of long genes  
746 important for neuronal function (McKinnon, 2016). Recent evidence suggests that many of these  
747 same long genes contribute to neuronal diversity and have the greatest expression in the  
748 forebrain (Sugino et al., 2019). In the developing cortex, scRNA-seq studies found that L5  
749 neurons had higher long gene expression compared to neurons from other cortical layers (Loo  
750 et al., 2019). In this study, we found that *Top1* deletion preferentially targeted many frontal  
751 areas with high L5 thickness, larger numbers of *Ctip2*<sup>+</sup> lower layer neurons, and greater long  
752 gene expression. These effects likely occur much earlier than the time point studied here as  
753 previous behavioural assays showed that severe motor deficits are present as early as P7  
754 (Fragola et al., 2020). Interestingly, inhibition of *S100a10* - the gene most correlated with neuron  
755 loss - was recently shown to have a neuroprotective effect, delaying motor neuron loss in a  
756 mouse model amyotrophic lateral sclerosis (ALS) (García-Morales et al., 2019). Because *Top1*  
757 deletion results in multiple stress factors that negatively impact cell health, additional studies will  
758 be needed to disambiguate which mechanisms ultimately lead to biased degeneration of certain  
759 neuronal subtypes across brain regions.

760  
761 While NuMorph has proven to be effective in analyzing moderately dense tissues such as the  
762 adult mouse cortex, the development of additional computational tools may be required to  
763 pursue more challenging experimental designs. For example, structures in the embryonic brain  
764 are typically of much higher cell density and vary in gross morphology across developmental  
765 time, making both cell quantification and image registration more difficult. In addition,  
766 segmentation and mapping of fine structures, such as neuronal processes, can be challenging  
767 with limited imaging resolution. Technological improvements in the next generation of light-sheet

768 systems can ultimately allow for quantitative interrogation of subcellular structures at high  
769 throughput (Migliori et al., 2018; Voleti et al., 2019). However, computational tools using deep  
770 neural networks have also proven to be effective in executing diverse segmentation tasks  
771 (Friedmann et al., 2020; Kirst et al., 2020; Schubert et al., 2019; Stringer et al., 2020) or even  
772 enhancing image quality (Weigert et al., 2018). Nevertheless, community-based efforts may be  
773 needed to generate sufficient annotation data for training deep learning models to accurately  
774 perform these tasks (Roskams and Popović, 2016). Together we hope these new imaging and  
775 computational tools will lead to greater adoption of tissue clearing methods for quantitative  
776 analyses, rather than qualitative visualizations, of how the entire brain structure is changed by  
777 genetic or environmental risk factors for neuropsychiatric disorders.

## 778 Acknowledgments

779 This work was supported by NSF (ACI-16449916 to JLS, GW, and AK) and NIH  
780 (R01MH121433, R01MH118349, R01MH120125 to JLS; R01NS110791 to GW; and  
781 R56AG058663, R35ES028366 to MJZ) and the Foundation of Hope (to GW). We thank Pablo  
782 Ariel of the Microscopy Services Laboratory and Michelle Itano of the Neuroscience Microscopy  
783 Core for assisting in sample imaging. The Microscopy Services Laboratory, Department of  
784 Pathology and Laboratory Medicine, is supported in part by P30 CA016086 Cancer Center Core  
785 Support Grant to the UNC Lineberger Comprehensive Cancer Center. The Neuroscience  
786 Microscopy Core is supported by P30 NS045892. Research reported in this publication was  
787 also supported in part by the North Carolina Biotech Center Institutional Support Grant 2016-  
788 IDG-1016.

## 789 Author Contributions

790 JLS and OK designed the study. OK performed tissue clearing, imaging, and developed  
791 NuMorph for image analysis. GF and MJZ provided fixed mouse brain tissue. OK generated all  
792 manual annotations for training the 3D-UNet model. EHF, JM, TL, ZH, and OK performed 3D  
793 nuclei volume tracing for evaluating the 3D-Unet model. AK provided computational  
794 infrastructure to distribute data and results. GW provided guidance on image processing. JLS  
795 supervised the work. OK and JLS wrote the first draft of the manuscript, and all authors  
796 provided feedback.

## 797 Declarations of Interest

798 The authors declare no conflicts of interest.

## 799 References

- 800 Arlotta, P., Molyneaux, B.J., Chen, J., Inoue, J., Kominami, R., and Macklis, J.D. (2005).  
801 Neuronal subtype-specific genes that control corticospinal motor neuron development in vivo.  
802 *Neuron* 45, 207–221.
- 803 Bentley, J.L. (1975). Multidimensional binary search trees used for associative searching.  
804 *Commun. ACM* 18, 509–517.
- 805 Bogovic, J.A., Hanslovsky, P., Wong, A., and Saalfeld, S. (2016). Robust registration of calcium  
806 images by learned contrast synthesis. In 2016 IEEE 13th International Symposium on  
807 Biomedical Imaging (ISBI), pp. 1123–1126.
- 808 Bria, A., and Iannello, G. (2012). TeraStitcher - a tool for fast automatic 3D-stitching of  
809 teravoxel-sized microscopy images. *BMC Bioinformatics* 13, 316.
- 810 Cai, R., Pan, C., Ghasemigharagoz, A., Todorov, M.I., Förster, B., Zhao, S., Bhatia, H.S.,  
811 Parra-Damas, A., Mrowka, L., Theodorou, D., et al. (2019). Panoptic imaging of transparent  
812 mice reveals whole-body neuronal projections and skull-meninges connections. *Nat. Neurosci.*  
813 22, 317–327.
- 814 Chalfoun, J., Majurski, M., Blattner, T., Bhadriraju, K., Keyrouz, W., Bajcsy, P., and Brady, M.  
815 (2017). MIST: Accurate and Scalable Microscopy Image Stitching Tool with Stage Modeling and  
816 Error Minimization. *Sci. Rep.* 7, 4988.
- 817 Chen, F., Tillberg, P.W., and Boyden, E.S. (2015). Optical imaging. Expansion microscopy.  
818 *Science* 347, 543–548.
- 819 Çiçek, Ö., Abdulkadir, A., Lienkamp, S.S., Brox, T., and Ronneberger, O. (2016). 3D U-Net:  
820 Learning Dense Volumetric Segmentation from Sparse Annotation.
- 821 Cunningham, F., Achuthan, P., Akanni, W., Allen, J., Amode, M.R., Armean, I.M., Bennett, R.,  
822 Bhai, J., Billis, K., Boddu, S., et al. (2019). Ensembl 2019. *Nucleic Acids Res.* 47, D745–D751.
- 823 David Arthur, S.V. (2007). K-means++: the advantages of careful seeding. In In Proceedings of  
824 the 18th Annual ACM-SIAM Symposium on Discrete Algorithms,.
- 825 Dean, K.M., Roudot, P., Welf, E.S., Danuser, G., and Fiolka, R. (2015). Deconvolution-free  
826 Subcellular Imaging with Axially Swept Light Sheet Microscopy. *Biophys. J.* 108, 2807–2815.
- 827 Dong, H.W. (2008). The Allen reference atlas: A digital color brain atlas of the C57Bl/6J male  
828 mouse. 57B, 6J.
- 829 Ertürk, A., Becker, K., Jähring, N., Mauch, C.P., Hojer, C.D., Egen, J.G., Hellal, F., Bradke, F.,  
830 Sheng, M., and Dodt, H.-U. (2012). Three-dimensional imaging of solvent-cleared organs using  
831 3DISCO. *Nat. Protoc.* 7, 1983–1995.
- 832 Fei, P., Nie, J., Lee, J., Ding, Y., Li, S., and Zhang, H. (2019). Subvoxel light-sheet microscopy  
833 for high-resolution high-throughput volumetric imaging of large biomedical specimens.  
834 *Advanced.*
- 835 Fragola, G., Mabb, A.M., Taylor-Blake, B., Niehaus, J.K., Chronister, W.D., Mao, H., Simon,



- 836 J.M., Yuan, H., Li, Z., McConnell, M.J., et al. (2020). Deletion of Topoisomerase 1 in excitatory  
837 neurons causes genomic instability and early onset neurodegeneration. *Nat. Commun.* *11*,  
838 1962.
- 839 Friedmann, D., Pun, A., Adams, E.L., Lui, J.H., Kebschull, J.M., Grutzner, S.M., Castagnola, C.,  
840 Tessier-Lavigne, M., and Luo, L. (2020). Mapping mesoscale axonal projections in the mouse  
841 brain using a 3D convolutional network. *Proc. Natl. Acad. Sci. U. S. A.* *117*, 11068–11075.
- 842 Fulcher, B.D., and Fornito, A. (2016). A transcriptional signature of hub connectivity in the  
843 mouse connectome. *Proc. Natl. Acad. Sci. U. S. A.* *113*, 1435–1440.
- 844 Fulcher, B.D., Arnatkevičiūtė, A., and Fornito, A. (2020). Overcoming bias in gene-set  
845 enrichment analyses of brain-wide transcriptomic data.
- 846 Gao, R., Asano, S.M., Upadhyayula, S., Pisarev, I., Milkie, D.E., Liu, T.-L., Singh, V., Graves,  
847 A., Huynh, G.H., Zhao, Y., et al. (2019). Cortical column and whole-brain imaging with molecular  
848 contrast and nanoscale resolution. *Science* *363*.
- 849 García-Morales, V., Rodríguez-Bey, G., Gómez-Pérez, L., Domínguez-Vías, G., González-  
850 Forero, D., Portillo, F., Campos-Caro, A., Gento-Caro, Á., Issaoui, N., Soler, R.M., et al. (2019).  
851 Sp1-regulated expression of p11 contributes to motor neuron degeneration by membrane  
852 insertion of TASK1. *Nat. Commun.* *10*, 3784.
- 853 Goebbels, S., Bormuth, I., Bode, U., Hermanson, O., Schwab, M.H., and Nave, K.-A. (2006).  
854 Genetic targeting of principal neurons in neocortex and hippocampus of NEX-Cre mice. *Genesis*  
855 *44*, 611–621.
- 856 Harris, J.A., Mihalas, S., Hirokawa, K.E., Whitesell, J.D., Choi, H., Bernard, A., Bohn, P.,  
857 Caldejon, S., Casal, L., Cho, A., et al. (2019). Hierarchical organization of cortical and thalamic  
858 connectivity. *Nature* *575*, 195–202.
- 859 Hörl, D., Rojas Rusak, F., Preusser, F., Tillberg, P., Randel, N., Chhetri, R.K., Cardona, A.,  
860 Keller, P.J., Harz, H., Leonhardt, H., et al. (2019). BigStitcher: reconstructing high-resolution  
861 image datasets of cleared and expanded samples. *Nat. Methods* *16*, 870–874.
- 862 Isensee, F., Kickingereder, P., Wick, W., Bendszus, M., and Maier-Hein, K.H. (2018). Brain  
863 Tumor Segmentation and Radiomics Survival Prediction: Contribution to the BRATS 2017  
864 Challenge.
- 865 King, I.F., Yandava, C.N., Mabb, A.M., Hsiao, J.S., Huang, H.-S., Pearson, B.L., Calabrese,  
866 J.M., Starmer, J., Parker, J.S., Magnuson, T., et al. (2013). Topoisomerases facilitate  
867 transcription of long genes linked to autism. *Nature* *501*, 58–62.
- 868 Kirst, C., Skriabine, S., Vieites-Prado, A., Topilko, T., Bertin, P., Gerschenfeld, G., Verny, F.,  
869 Topilko, P., Michalski, N., Tessier-Lavigne, M., et al. (2020). Mapping the Fine-Scale  
870 Organization and Plasticity of the Brain Vasculature. *Cell* *180*, 780–795.e25.
- 871 Klein, S., Staring, M., Murphy, K., Viergever, M.A., and Pluim, J.P.W. (2010). elastix: a toolbox  
872 for intensity-based medical image registration. *IEEE Trans. Med. Imaging* *29*, 196–205.
- 873 Kruskal, J.B. (1956). On the Shortest Spanning Subtree of a Graph and the Traveling Salesman  
874 Problem. *Proc. Am. Math. Soc.* *7*, 48–50.

- 875 Ku, T., Swaney, J., Park, J.-Y., Albanese, A., Murray, E., Cho, J.H., Park, Y.-G., Mangena, V.,  
876 Chen, J., and Chung, K. (2016). Multiplexed and scalable super-resolution imaging of three-  
877 dimensional protein localization in size-adjustable tissues. *Nat. Biotechnol.* *34*, 973–981.
- 878 Lehmann, G., and Legland, D. (2012). Efficient N-Dimensional surface estimation using Crofton  
879 formula and run-length encoding. *Efficient N-Dimensional Surface Estimation Using Crofton*  
880 *Formula and Run-Length Encoding*, Kitware INC(2012).
- 881 Lein, E.S., Hawrylycz, M.J., Ao, N., Ayres, M., Bensinger, A., Bernard, A., Boe, A.F., Boguski,  
882 M.S., Brockway, K.S., Byrnes, E.J., et al. (2007). Genome-wide atlas of gene expression in the  
883 adult mouse brain. *Nature* *445*, 168–176.
- 884 Liebmann, T., Renier, N., Bettayeb, K., Greengard, P., Tessier-Lavigne, M., and Flajolet, M.  
885 (2016). Three-Dimensional Study of Alzheimer’s Disease Hallmarks Using the iDISCO Clearing  
886 Method. *Cell Rep.* *16*, 1138–1152.
- 887 Loo, L., Simon, J.M., Xing, L., McCoy, E.S., Niehaus, J.K., Guo, J., Anton, E.S., and Zylka, M.J.  
888 (2019). Single-cell transcriptomic analysis of mouse neocortical development. *Nat. Commun.*  
889 *10*, 134.
- 890 Lowe, D.G. (2004). Distinctive Image Features from Scale-Invariant Keypoints. *Int. J. Comput.*  
891 *Vis.* *60*, 91–110.
- 892 Mabb, A.M., Simon, J.M., King, I.F., Lee, H.-M., An, L.-K., Philpot, B.D., and Zylka, M.J. (2016).  
893 Topoisomerase 1 Regulates Gene Expression in Neurons through Cleavage Complex-  
894 Dependent and -Independent Mechanisms. *PLoS One* *11*, e0156439.
- 895 Matsumoto, K., Mitani, T.T., Horiguchi, S.A., Kaneshiro, J., Murakami, T.C., Mano, T.,  
896 Fujishima, H., Konno, A., Watanabe, T.M., Hirai, H., et al. (2019). Advanced CUBIC tissue  
897 clearing for whole-organ cell profiling. *Nat. Protoc.* *14*, 3506–3537.
- 898 McKinnon, P.J. (2016). Topoisomerases and the regulation of neural function. *Nat. Rev.*  
899 *Neurosci.* *17*, 673–679.
- 900 Metz, C.T., Klein, S., Schaap, M., van Walsum, T., and Niessen, W.J. (2011). Nonrigid  
901 registration of dynamic medical imaging data using nD + t B-splines and a groupwise  
902 optimization approach. *Med. Image Anal.* *15*, 238–249.
- 903 Migliori, B., Datta, M.S., Dupre, C., Apak, M.C., Asano, S., Gao, R., Boyden, E.S., Hermanson,  
904 O., Yuste, R., and Tomer, R. (2018). Light sheet theta microscopy for rapid high-resolution  
905 imaging of large biological samples. *BMC Biol.* *16*, 57.
- 906 Milosevic, A., Liebmann, T., Knudsen, M., Schintu, N., Svenningsson, P., and Greengard, P.  
907 (2017). Cell- and region-specific expression of depression-related protein p11 (S100a10) in the  
908 brain. *J. Comp. Neurol.* *525*, 955–975.
- 909 Molyneaux, B.J., Arlotta, P., Menezes, J.R.L., and Macklis, J.D. (2007). Neuronal subtype  
910 specification in the cerebral cortex. *Nat. Rev. Neurosci.* *8*, 427–437.
- 911 Murakami, T.C., Mano, T., Saikawa, S., Horiguchi, S.A., Shigeta, D., Baba, K., Sekiya, H.,  
912 Shimizu, Y., Tanaka, K.F., Kiyonari, H., et al. (2018). A three-dimensional single-cell-resolution  
913 whole-brain atlas using CUBIC-X expansion microscopy and tissue clearing. *Nat. Neurosci.* *21*,

- 914 625–637.
- 915 Murray, E., Cho, J.H., Goodwin, D., Ku, T., Swaney, J., Kim, S.-Y., Choi, H., Park, Y.-G., Park,  
916 J.-Y., Hubbert, A., et al. (2015). Simple, Scalable Proteomic Imaging for High-Dimensional  
917 Profiling of Intact Systems. *Cell* 163, 1500–1514.
- 918 Pan, C., Cai, R., Quacquarelli, F.P., Ghasemigharagoz, A., Loubopoulos, A., Matryba, P.,  
919 Plesnila, N., Dichgans, M., Hellal, F., and Ertürk, A. (2016). Shrinkage-mediated imaging of  
920 entire organs and organisms using uDISCO. *Nat. Methods* 13, 859–867.
- 921 Park, Y.-G., Sohn, C.H., Chen, R., McCue, M., Yun, D.H., Drummond, G.T., Ku, T., Evans, N.B.,  
922 Oak, H.C., Trieu, W., et al. (2018). Protection of tissue physicochemical properties using  
923 polyfunctional crosslinkers. *Nat. Biotechnol.*
- 924 Pende, M., Becker, K., Wanis, M., Saghafi, S., Kaur, R., Hahn, C., Pende, N., Foroughipour, M.,  
925 Hummel, T., and Dodt, H.-U. (2018). High-resolution ultramicroscopy of the developing and  
926 adult nervous system in optically cleared *Drosophila melanogaster*. *Nat. Commun.* 9, 4731.
- 927 Peng, T., Thorn, K., Schroeder, T., Wang, L., Theis, F.J., Marr, C., and Navab, N. (2017). A  
928 BaSiC tool for background and shading correction of optical microscopy images. *Nat. Commun.*  
929 8, 14836.
- 930 Renier, N., Adams, E.L., Kirst, C., Wu, Z., Azevedo, R., Kohl, J., Autry, A.E., Kadiri, L., Umadevi  
931 Venkataraju, K., Zhou, Y., et al. (2016). Mapping of Brain Activity by Automated Volume  
932 Analysis of Immediate Early Genes. *Cell* 165, 1789–1802.
- 933 Richardson, D.S., and Lichtman, J.W. (2015). Clarifying Tissue Clearing. *Cell* 162, 246–257.
- 934 Roskams, J., and Popović, Z. (2016). Power to the People: Addressing Big Data Challenges in  
935 Neuroscience by Creating a New Cadre of Citizen Neuroscientists. *Neuron* 92, 658–664.
- 936 Schubert, P.J., Dorkenwald, S., Januszewski, M., Jain, V., and Kornfeld, J. (2019). Learning  
937 cellular morphology with neural networks. *Nat. Commun.* 10, 2736.
- 938 Shamash, P., Carandini, M., Harris, K., and Steinmetz, N. (2018). A tool for analyzing electrode  
939 tracks from slice histology.
- 940 Shattuck, D.W., and Leahy, R.M. (2002). BrainSuite: an automated cortical surface identification  
941 tool. *Med. Image Anal.* 6, 129–142.
- 942 Shin Yim, Y., Park, A., Berrios, J., Lafourcade, M., Pascual, L.M., Soares, N., Yeon Kim, J.,  
943 Kim, S., Kim, H., Waisman, A., et al. (2017). Reversing behavioural abnormalities in mice  
944 exposed to maternal inflammation. *Nature* 549, 482–487.
- 945 Stoner, R., Chow, M.L., Boyle, M.P., Sunkin, S.M., Mouton, P.R., Roy, S., Wynshaw-Boris, A.,  
946 Colamarino, S.A., Lein, E.S., and Courchesne, E. (2014). Patches of disorganization in the  
947 neocortex of children with autism. *N. Engl. J. Med.* 370, 1209–1219.
- 948 Stringer, C., Michaelos, M., and Pachitariu, M. (2020). Cellpose: a generalist algorithm for  
949 cellular segmentation.
- 950 Sugino, K., Clark, E., Schulmann, A., Shima, Y., Wang, L., Hunt, D.L., Hooks, B.M., Tränkner,  
951 D., Chandrashekar, J., Picard, S., et al. (2019). Mapping the transcriptional diversity of

- 952 genetically and anatomically defined cell populations in the mouse brain. *Elife* 8.
- 953 Susaki, E.A., Tainaka, K., Perrin, D., Yukinaga, H., Kuno, A., and Ueda, H.R. (2015). Advanced  
954 CUBIC protocols for whole-brain and whole-body clearing and imaging. *Nat. Protoc.* 10, 1709–  
955 1727.
- 956 Susaki, E.A., Shimizu, C., Kuno, A., Tainaka, K., Li, X., Nishi, K., Morishima, K., Ono, H., Ode,  
957 K.L., Saeki, Y., et al. (2020). Versatile whole-organ/body staining and imaging based on  
958 electrolyte-gel properties of biological tissues. *Nat. Commun.* 11, 1982.
- 959 Tainaka, K., Kubota, S.I., Suyama, T.Q., Susaki, E.A., Perrin, D., Ukai-Tadenuma, M., Ukai, H.,  
960 and Ueda, H.R. (2014). Whole-body imaging with single-cell resolution by tissue decolorization.  
961 *Cell* 159, 911–924.
- 962 Tasic, B., Yao, Z., Graybiel, L.T., Smith, K.A., Nguyen, T.N., Bertagnolli, D., Goldy, J., Garren,  
963 E., Economo, M.N., Viswanathan, S., et al. (2018). Shared and distinct transcriptomic cell types  
964 across neocortical areas. *Nature* 563, 72–78.
- 965 Tomer, R., Ye, L., Hsueh, B., and Deisseroth, K. (2014). Advanced CLARITY for rapid and high-  
966 resolution imaging of intact tissues. *Nat. Protoc.* 9, 1682–1697.
- 967 Tsien, J.Z., Chen, D.F., Gerber, D., Tom, C., Mercer, E.H., Anderson, D.J., Mayford, M., Kandel,  
968 E.R., and Tonegawa, S. (1996). Subregion- and cell type-restricted gene knockout in mouse  
969 brain. *Cell* 87, 1317–1326.
- 970 Ueda, H.R., Ertürk, A., Chung, K., Gradinaru, V., Chédotal, A., Tomancak, P., and Keller, P.J.  
971 (2020). Tissue clearing and its applications in neuroscience. *Nat. Rev. Neurosci.* 21, 61–79.
- 972 Voigt, F.F., Kirschenbaum, D., Platonova, E., Pagès, S., Campbell, R.A.A., Kastli, R., Schaettin,  
973 M., Egolf, L., van der Bourg, A., Bethge, P., et al. (2019). The mesoSPIM initiative: open-source  
974 light-sheet microscopes for imaging cleared tissue. *Nat. Methods* 16, 1105–1108.
- 975 Voleti, V., Patel, K.B., Li, W., Perez Campos, C., Bharadwaj, S., Yu, H., Ford, C., Casper, M.J.,  
976 Yan, R.W., Liang, W., et al. (2019). Real-time volumetric microscopy of in vivo dynamics and  
977 large-scale samples with SCAPE 2.0. *Nat. Methods* 16, 1054–1062.
- 978 Wang, Q., Ding, S.-L., Li, Y., Royall, J., Feng, D., Lesnar, P., Graddis, N., Naeemi, M., Facer,  
979 B., Ho, A., et al. (2020). The Allen Mouse Brain Common Coordinate Framework: A 3D  
980 Reference Atlas. *Cell* 181, 936–953.e20.
- 981 Weigert, M., Schmidt, U., Boothe, T., Müller, A., Dibrov, A., Jain, A., Wilhelm, B., Schmidt, D.,  
982 Broaddus, C., Culley, S., et al. (2018). Content-aware image restoration: pushing the limits of  
983 fluorescence microscopy. *Nat. Methods* 15, 1090–1097.
- 984 Ye, L., Allen, W.E., Thompson, K.R., Tian, Q., Hsueh, B., Ramakrishnan, C., Wang, A.-C.,  
985 Jennings, J.H., Adhikari, A., Halpern, C.H., et al. (2016). Wiring and Molecular Features of  
986 Prefrontal Ensembles Representing Distinct Experiences. *Cell* 165, 1776–1788.
- 987 Yun, D.H., Park, Y.-G., Cho, J.H., Kamentsky, L., Evans, N.B., Albanese, A., Xie, K., Swaney,  
988 J., Sohn, C.H., Tian, Y., et al. (2019). Ultrafast immunostaining of organ-scale tissues for  
989 scalable proteomic phenotyping.
- 990 Zeisel, A., Muñoz-Manchado, A.B., Codeluppi, S., Lönnerberg, P., La Manno, G., Juréus, A.,

991 Marques, S., Munguba, H., He, L., Betsholtz, C., et al. (2015). Brain structure. Cell types in the  
992 mouse cortex and hippocampus revealed by single-cell RNA-seq. *Science* 347, 1138–1142.

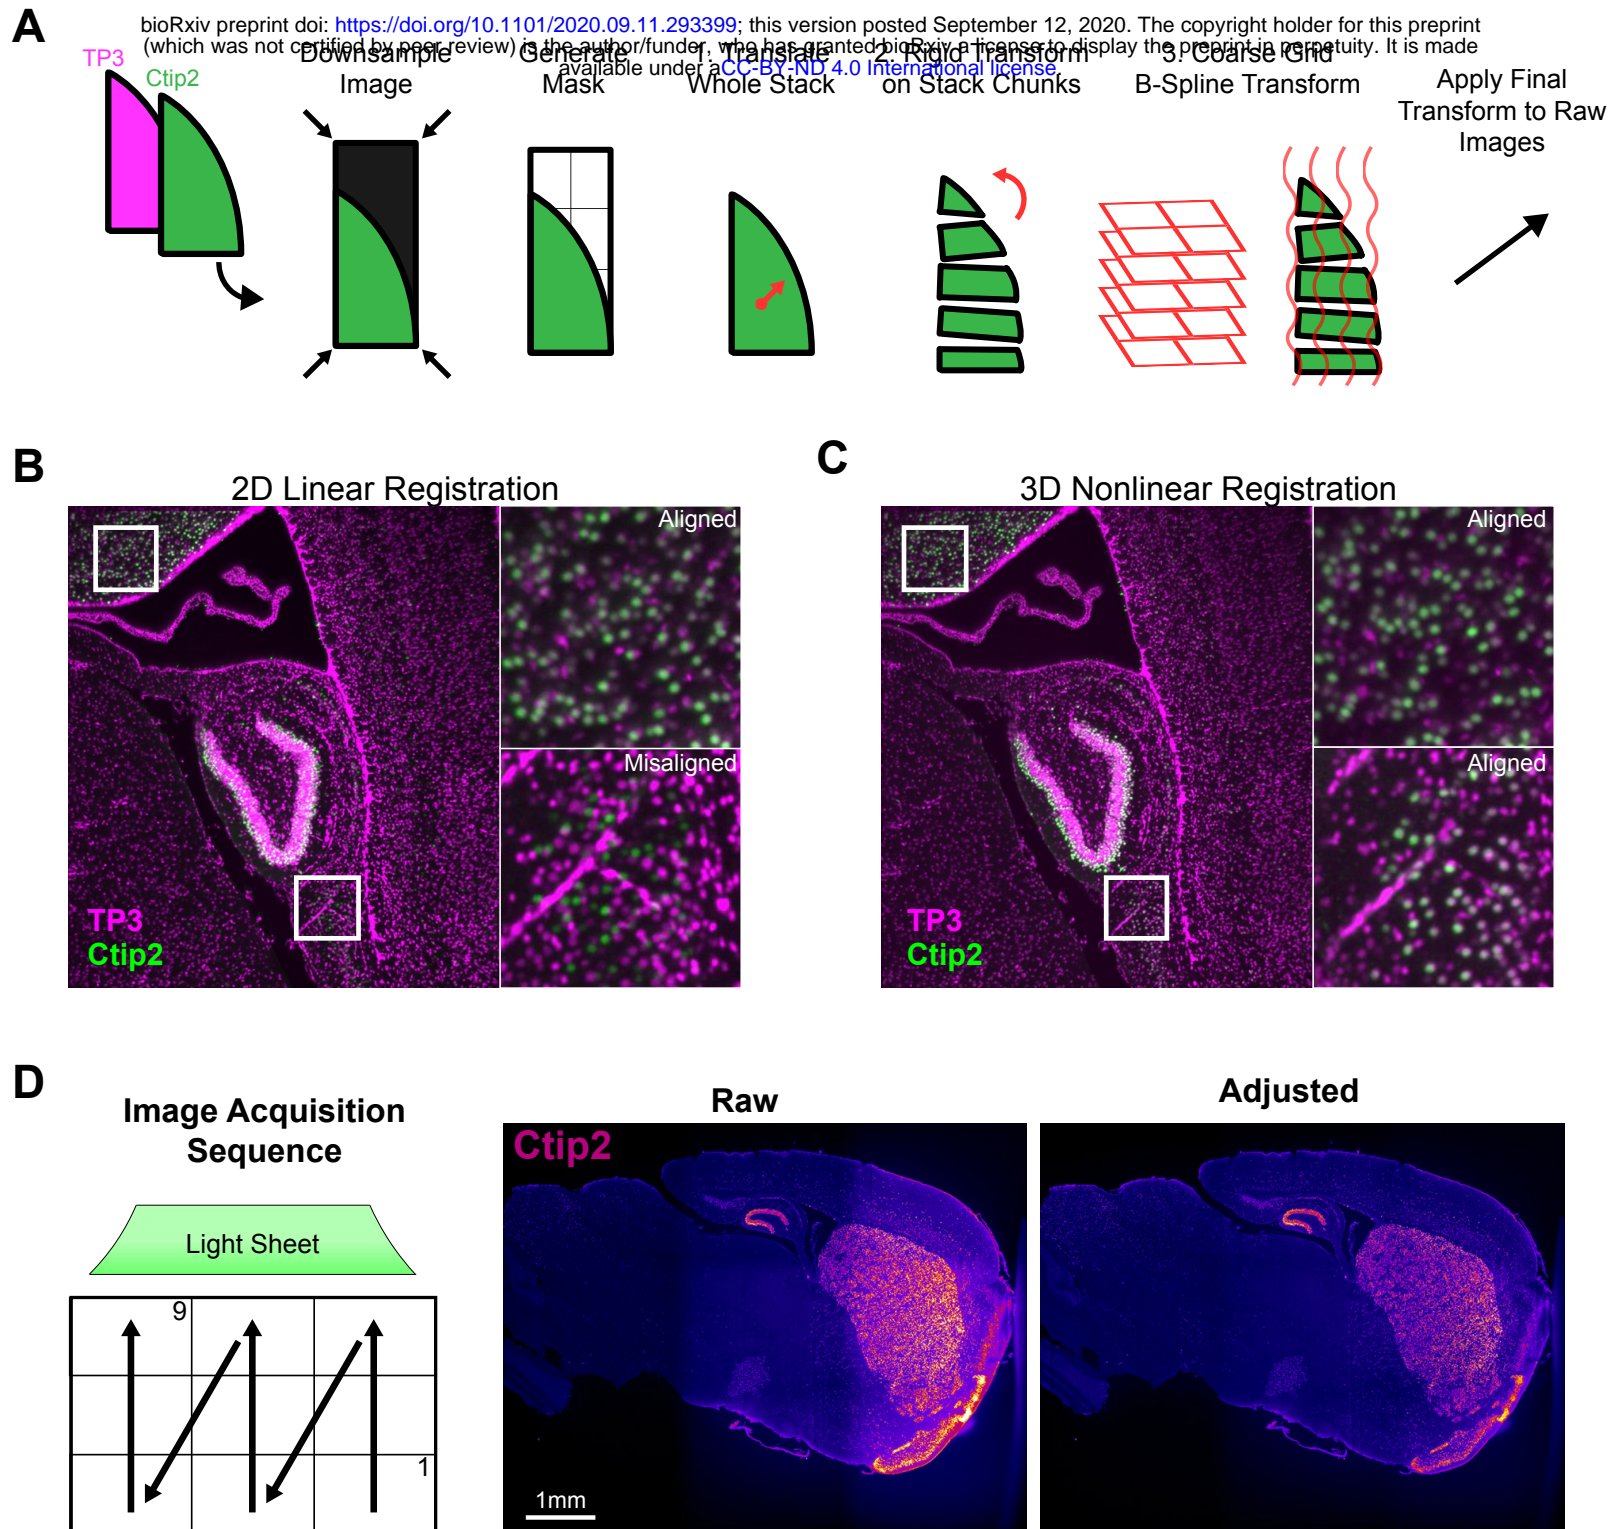

**Figure S1, Related to Figure 1. Nonlinear Alignment and Intensity Adjustment of 3D Multichannel Images.**

A. Overview of alignment procedures.

B. Example of channel misalignment after 2D registration by translation showing only part of the image aligning correctly.

C. Same section as in B after the nonlinear alignment procedure.

D. *Top1* cKO sample images of Ctip2 labeling with (right) or without (left) adjusting intensities for tile positions and light-sheet width.

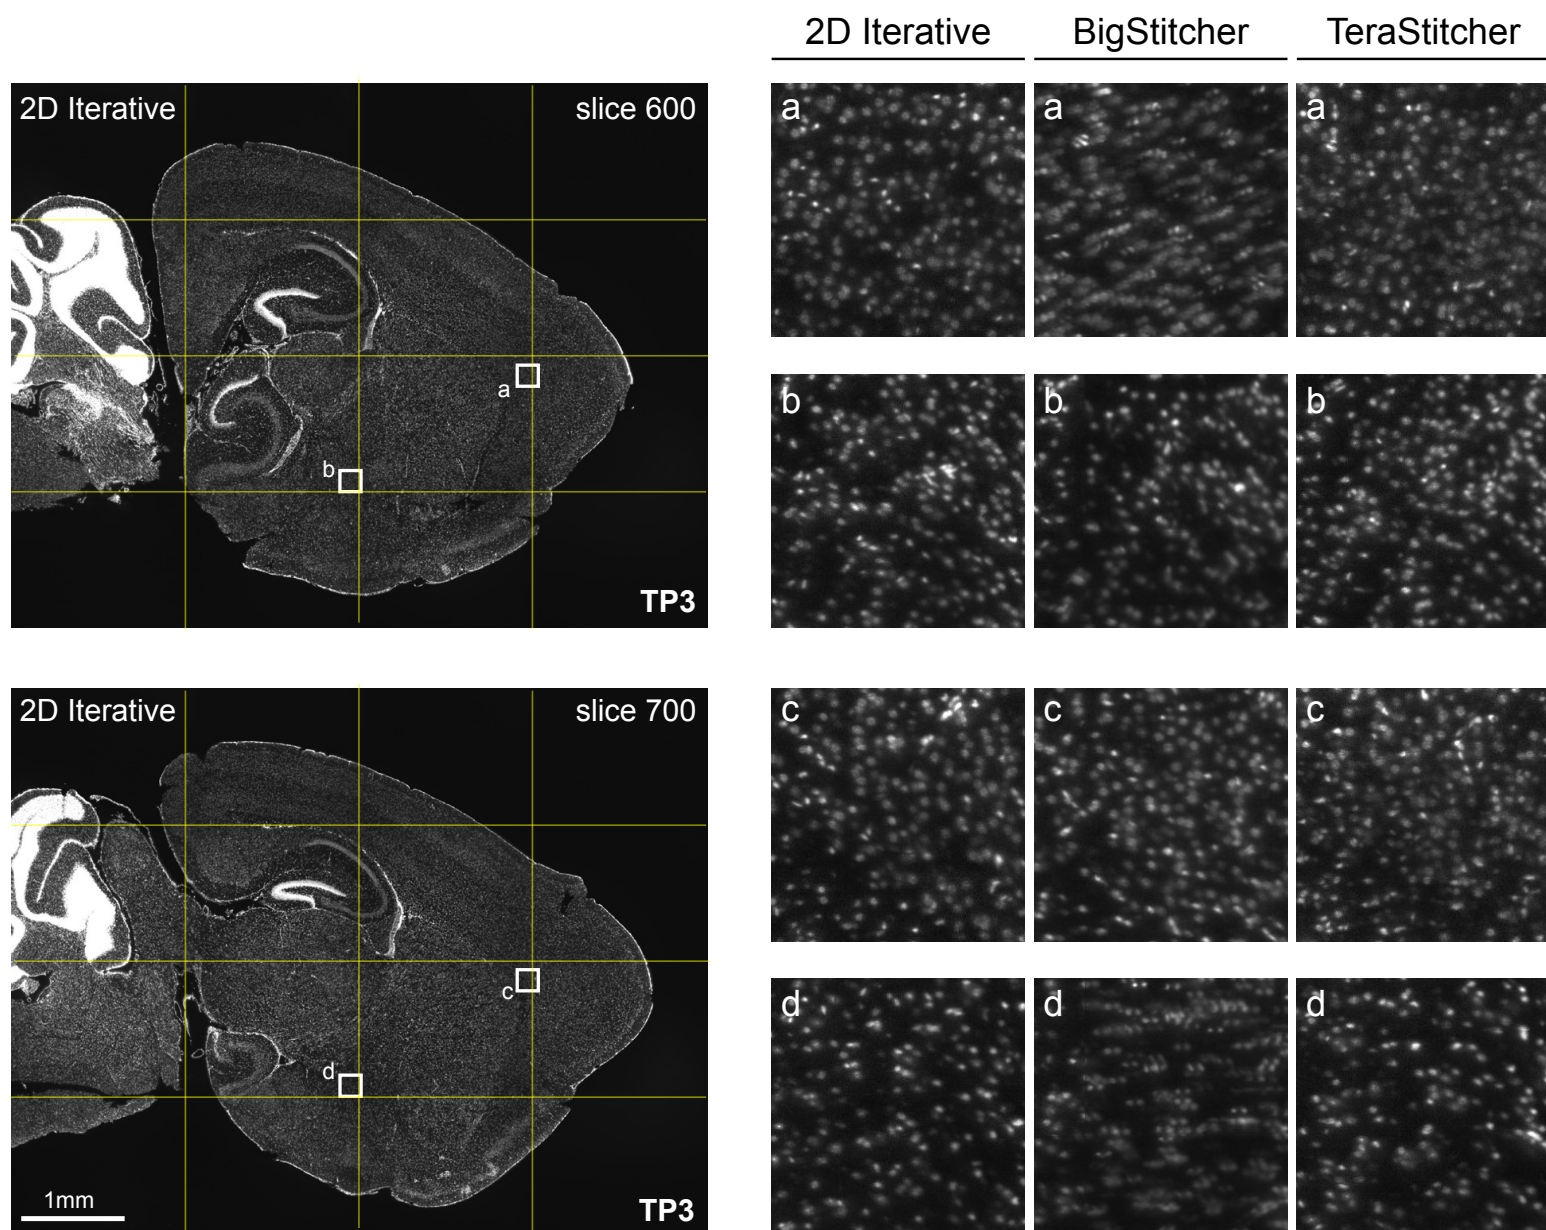

**Figure S2, Related to Figure 1. Iterative 2D Stitching of Multi-Tile Light Sheet Images.**

Sample results from 2D iterative stitching of WT mouse hemisphere compared with other dedicated 3D stitching software. Yellow lines indicate approximate stitching seams.

**A**

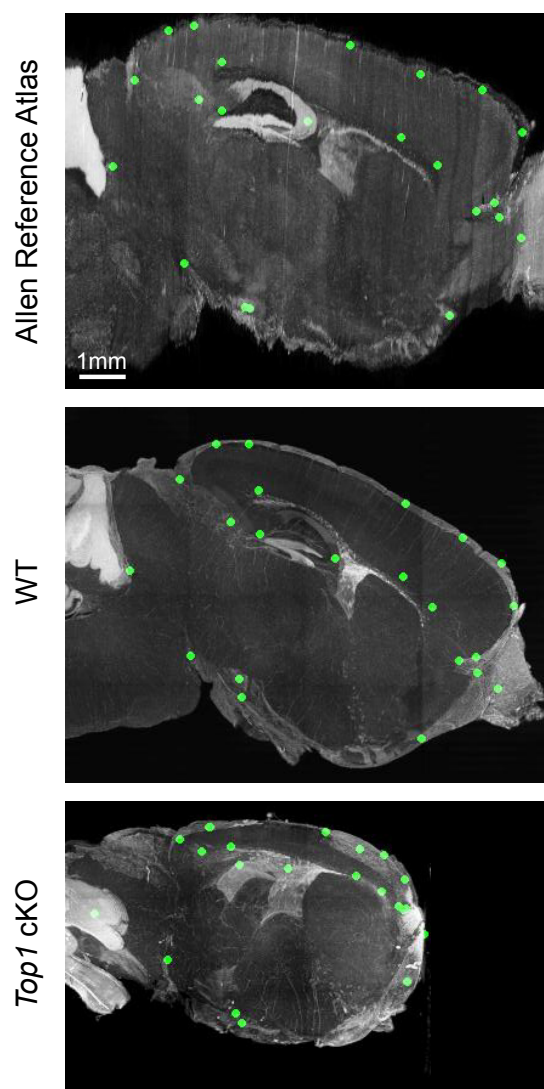

**B**

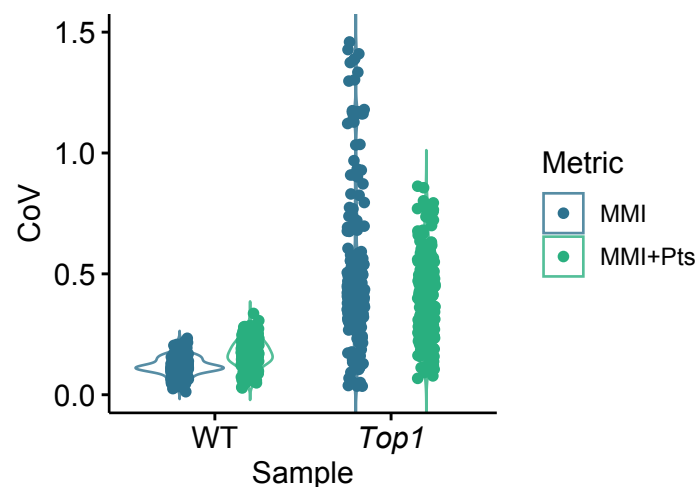

**C**

|                               | WT (MMI)         | WT (MMI+Pts)     | Top1 (MMI)       | Top1 (MMI+Pts)                 |
|-------------------------------|------------------|------------------|------------------|--------------------------------|
| DICE                          | 0.917<br>(0.017) | 0.923<br>(0.008) | 0.526<br>(0.189) | <b>0.890</b><br><b>(0.013)</b> |
| CoV (All Cortical Structures) | 0.124<br>(0.037) | 0.167<br>(0.059) | 0.524<br>(0.367) | 0.422<br>(0.169)               |
| CoV (Full Cortex Registered)  | 0.096            | 0.094            | 0.203            | 0.184                          |
| CoV (Full Cortex Manual)      | 0.081            |                  | 0.242            |                                |

**Figure S3, Related to Figure 2. Image Landmark Selection for Points-Guided Image Registration.**

A. 1mm thick sagittal maximum intensity projection displaying corresponding points positions in ARA, WT, and Top1 cKO brain hemispheres.

B. Coefficients of variation (CoV) of structure volumes for all cortical annotations in the ARA after registration with or without corresponding points.

C. DICE scores and CoV metrics for indicated registration procedures. Data represented as mean ( $\pm$  standard deviation). CoV was calculated for individual ARA annotations (242 structures plotted in B) or the full isocortex after registration. These compared with the CoV for the full cortex based on manual annotation. Bold value: Top1 MMI/Top1 MMI+ Pts,  $p < 0.001$ .



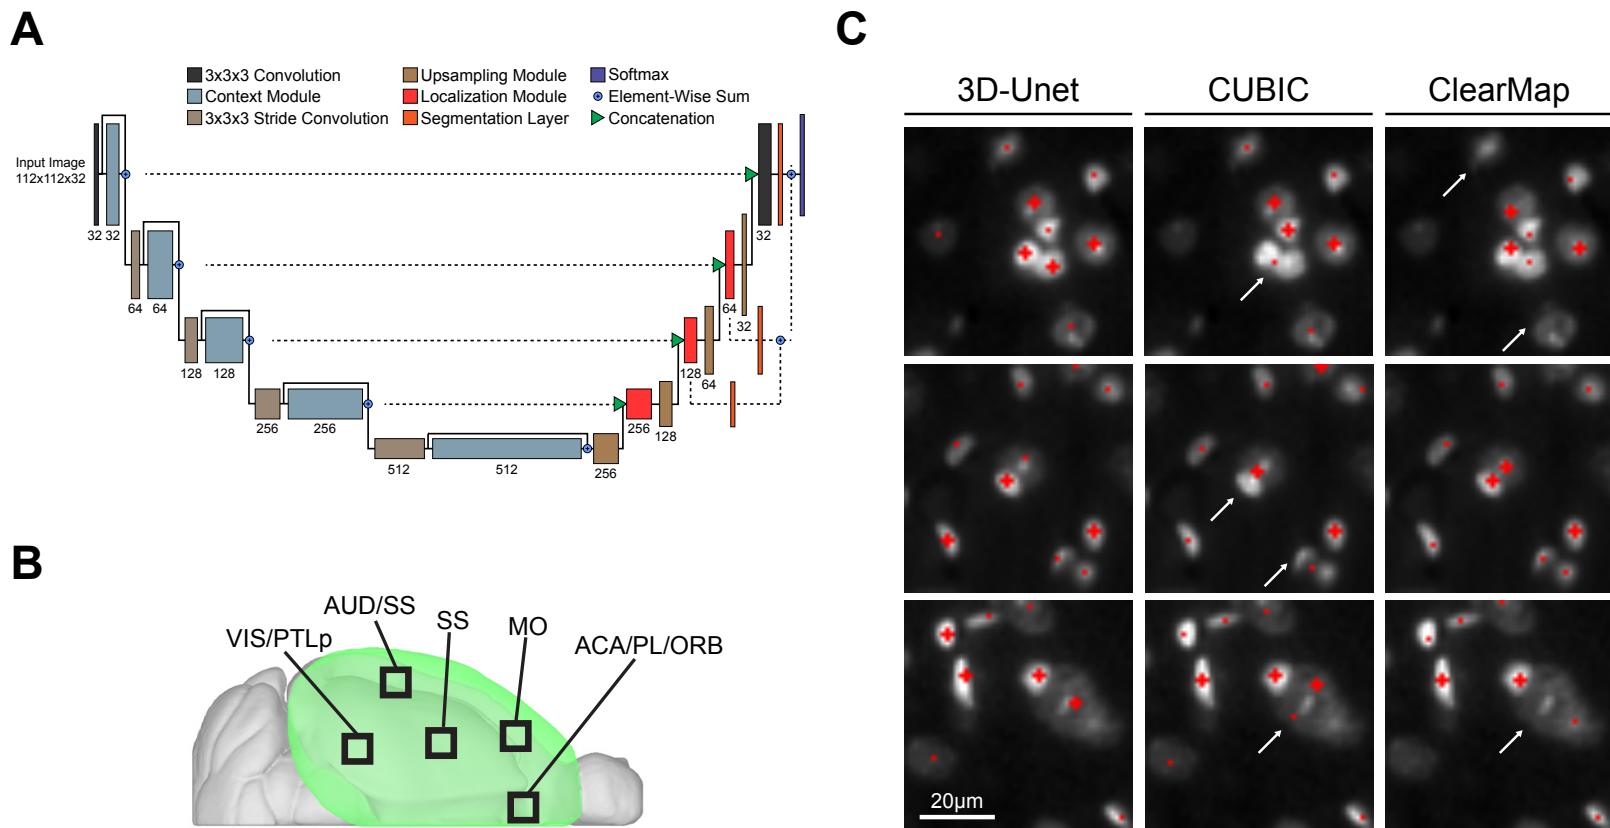

**Figure S4, Related to Figure 3. 3D-Unet Training and Evaluation.**

A. 3D-Unet architecture adapted from Isensee et al. 2018.

B. Approximate patch locations used for training the 3D-Unet nuclei detection model

C. Example images of nuclei detection results. Cross symbols indicate centroids in the displayed z slice whereas points indicate centroids in slices directly above or below. Arrows indicate detection errors in the full 3D volume.

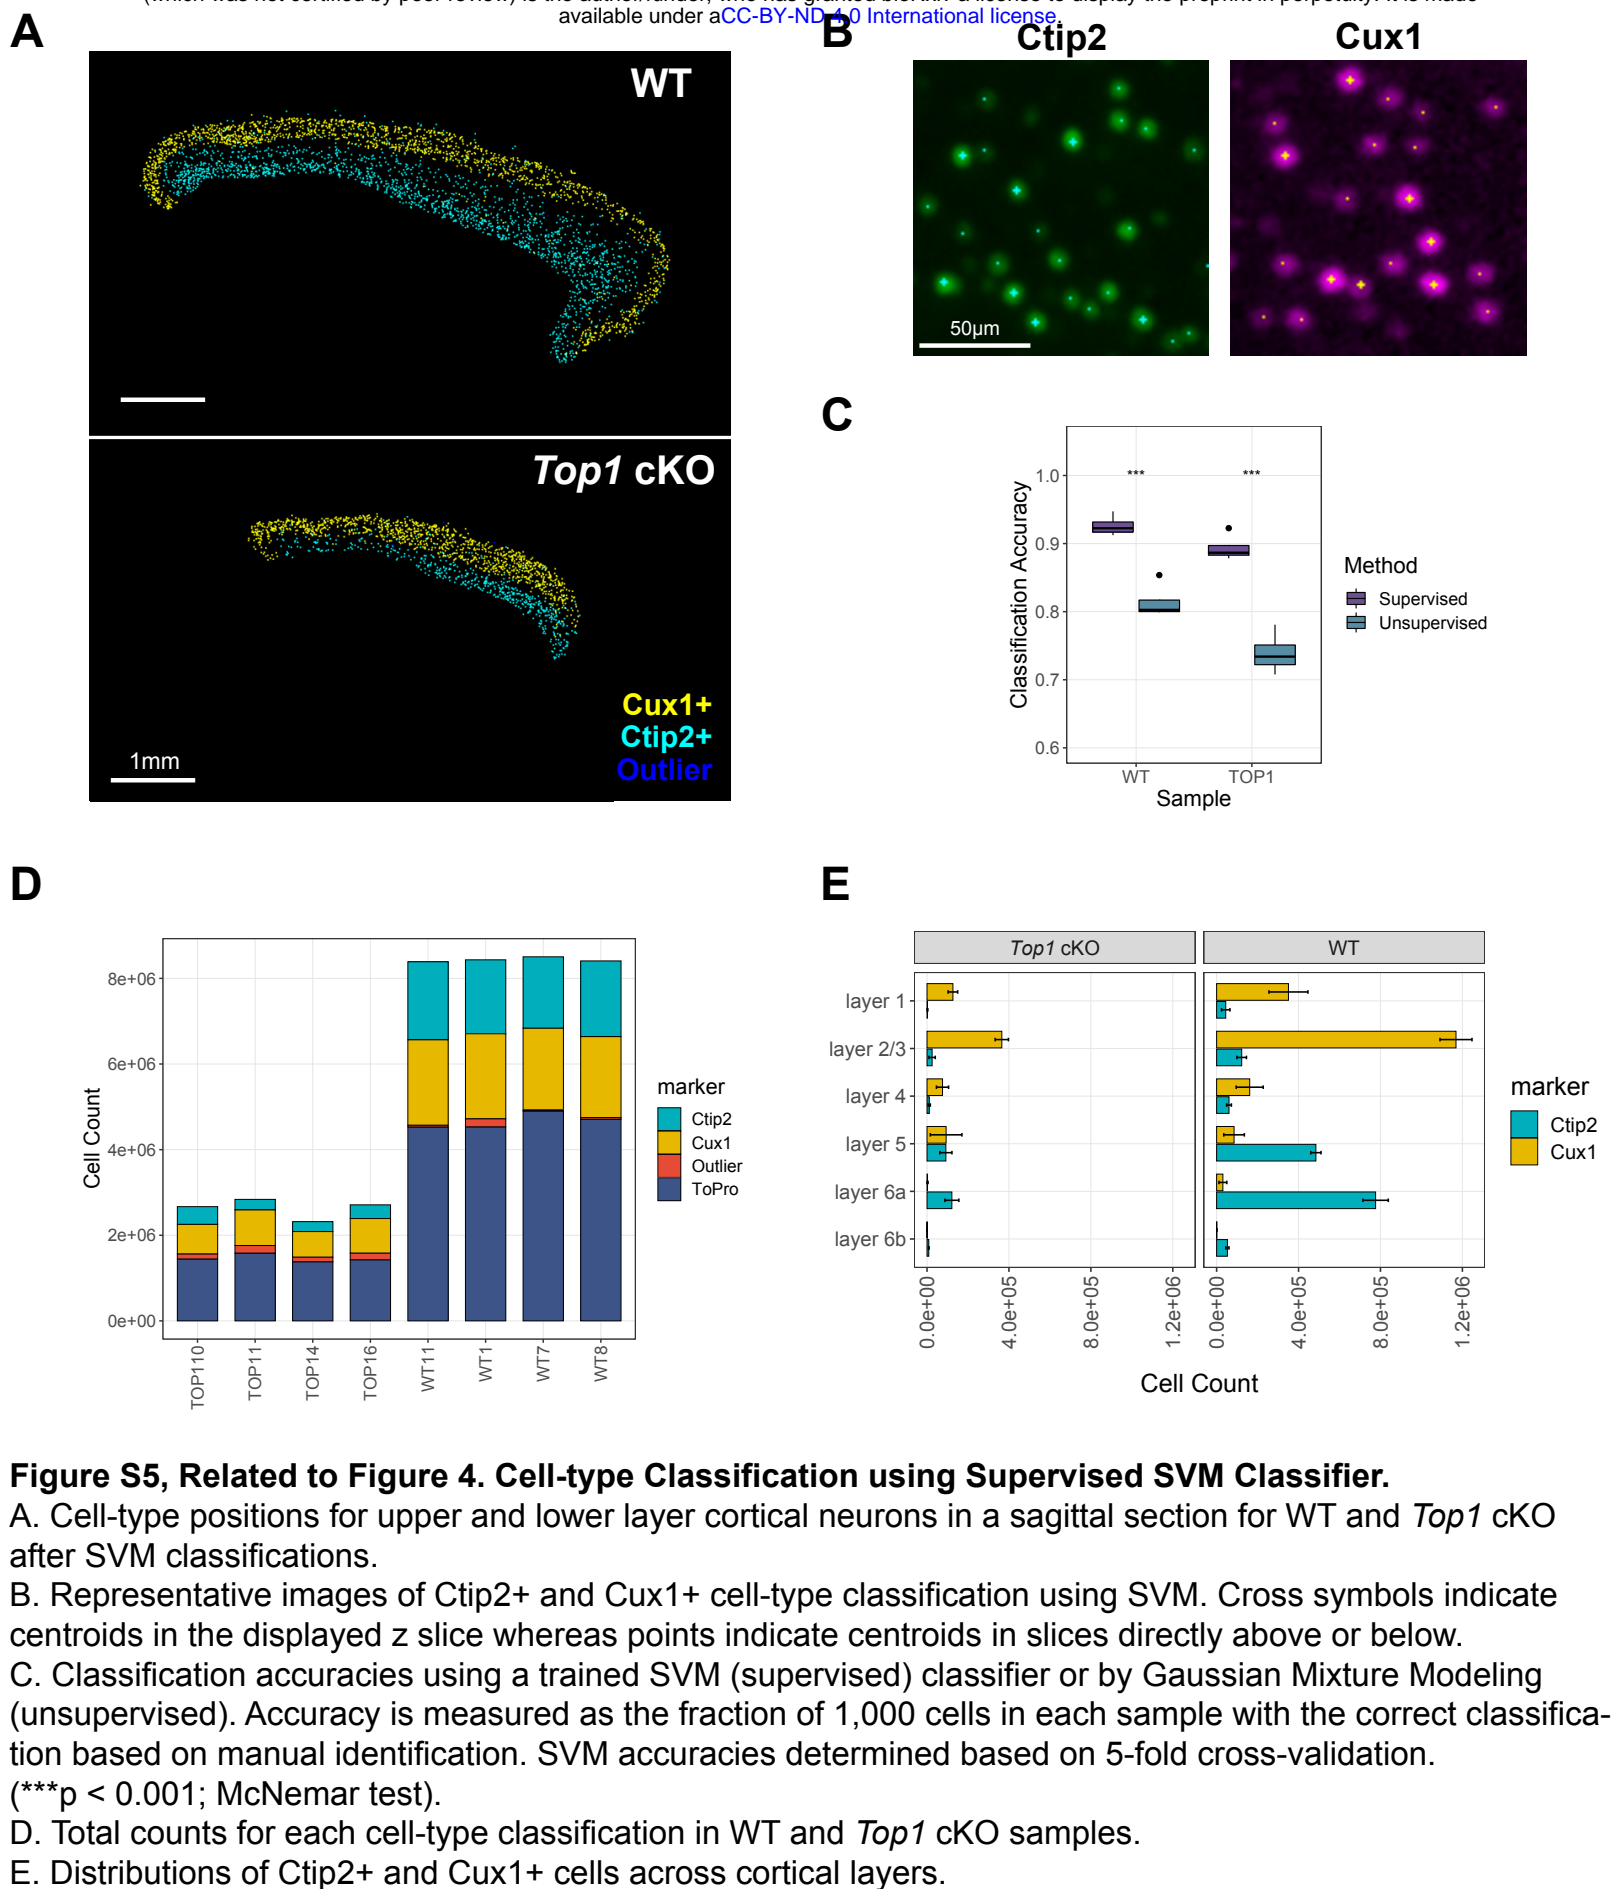

**Figure S5, Related to Figure 4. Cell-type Classification using Supervised SVM Classifier.**

A. Cell-type positions for upper and lower layer cortical neurons in a sagittal section for WT and *Top1* cKO after SVM classifications.

B. Representative images of Ctip2+ and Cux1+ cell-type classification using SVM. Cross symbols indicate centroids in the displayed z slice whereas points indicate centroids in slices directly above or below.

C. Classification accuracies using a trained SVM (supervised) classifier or by Gaussian Mixture Modeling (unsupervised). Accuracy is measured as the fraction of 1,000 cells in each sample with the correct classification based on manual identification. SVM accuracies determined based on 5-fold cross-validation. (\*\*\*)  $p < 0.001$ ; McNemar test).

D. Total counts for each cell-type classification in WT and *Top1* cKO samples.

E. Distributions of Ctip2+ and Cux1+ cells across cortical layers.

**A**

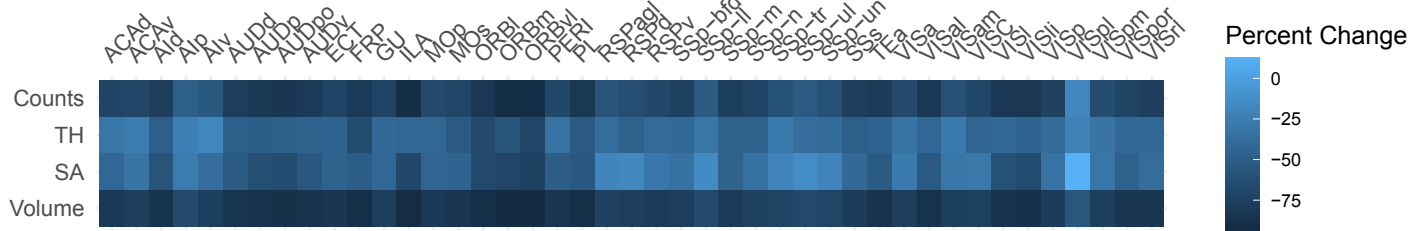

**B**

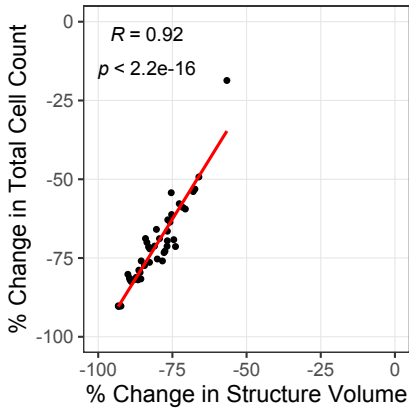

**C**

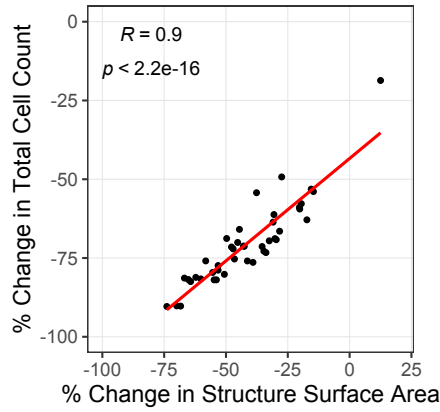

**D**

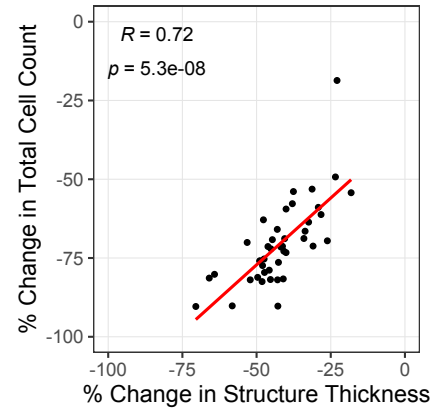

**E**

**Top 25 Gene Ontologies Associated with Increased Reduction in Excitatory Neurons**

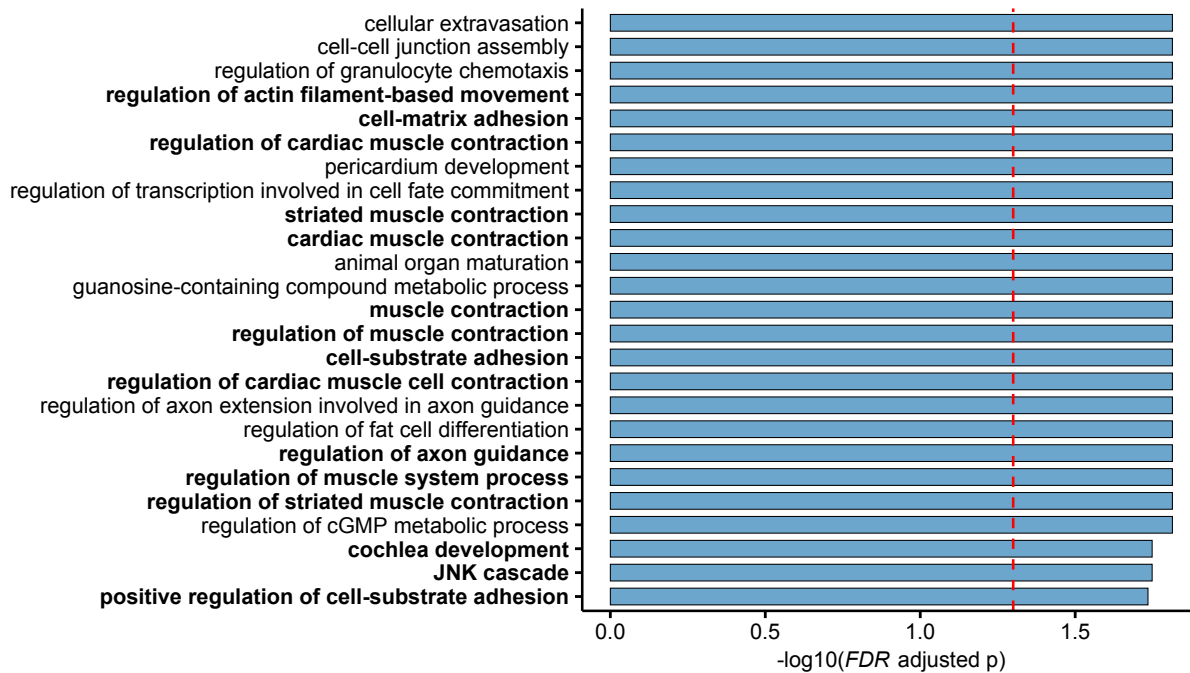

**Figure S6, Related to Figure 6. Structural and Molecular Associations with Cell Loss in the *Top1* cKO Model.**

A. Heatmap displaying percent change in cortical cell count, volume, surface area, and thickness for each cortical region.

B-D. Correlation between total cell count difference and volume (B), surface area (C), and thickness (D) across cortical regions.

E. Gene ontology showing the top 25 most significant categories correlated with neuron loss in *Top1* cKO. Bolded categories contain at least 1 gene differentially expressed in *Top1* cKO from scRNA-seq studies.

**Table S1, Related to Figure 4. Volume, Cell Count, and Cell Density Statistics for *Top1* cKO.**

Cell counts and densities are summed for all counted nuclei after removing outliers (ToPro) as well as cells classified Ctip2+ or Cux1+.

**Video S1, Related to Figure 4. Visual Comparison of WT and *Top1* cKO Brain Hemispheres.**

Representative examples of iDISCO-processed WT and *Top1* cKO samples labelling TO-PRO-3 (white), Ctip2 (green), and Cux1(magenta). Images were downsampled to 10  $\mu\text{m}/\text{voxel}$  for smoother rendering. Cortical cell-type classifications displayed as point clouds (white: Ctip2-/Cux1-, teal: Ctip2+, yellow: Cux1+).

**Video S2, Related to Figure 4. 3D Inspection of NuMorph Nuclei Counting and Cell-type Classification.**

Visualization of a 400  $\mu\text{m}$  thick WT sagittal section at 1.21x1.21x4  $\mu\text{m}/\text{voxel}$  resolution labelling TO-PRO-3 (white), Ctip2 (green), and Cux1(magenta). Cortical cell-type classifications displayed as point clouds (white: Ctip2-/Cux1-, teal: Ctip2+, yellow: Cux1+).
